# Supplementary material for: Linear BeNCO and OBeNC: kinetically stable neutral Be-bearing free molecules
Source: Royal Society of Chemistry journal article supplement (doi:10.1039/d3nj01298k), 2023-01-01
Supplement: d3nj01298k1.pdf [file d3nj01298k1.pdf]

## Electronic Supplementary Information

### Linear BeNCO and OBeNC: kinetically stable neutral Be-bearing free molecules

Ning Xi, Cai-Xin Jia, and Hai-Tao Yu\*

*School of Chemistry and Materials Science, Heilongjiang University, Harbin 150080, P. R. China*

E-mail: [yuhaitao@hlju.edu.cn](mailto:yuhaitao@hlju.edu.cn)

## Captions of Supporting Figures and Tables

**Table S1** Internal coordinates of the isomers and transition states, located at the B2PLYPD3/6-311+G(2df) level of theory, of the [Be,N,C,O] system.

**Table S2** Internal coordinates of the isomers and transition states, located at the B3LYP-D3BJ/6-311+G(2df) level of theory, of the [Be,N,C,O] system.

**Table S3** Internal coordinates of the isomers and transition states, located at the M06-2X-D3/*aug-cc-pVQZ* level of theory, of the [Be,N,C,O] system.

**Table S4** Relative electronic energies ( $\Delta E$ , in kcal mol<sup>-1</sup>) with ZPVE correction, relative enthalpies ( $\Delta H$ , in kcal mol<sup>-1</sup>), and relative Gibbs free energies ( $\Delta G$ , in kcal mol<sup>-1</sup>) of the isomers, transition states, and dissociation fragments of the [Be,N,C,O] molecular system computed at different levels and the HOMO-LUMO gaps (HLGs, in eV) computed at the B2PLYPD3/6-311+G(2df).

**Table S5** Relative electronic energies ( $E$ , in kcal mol<sup>-1</sup>) with ZPVE correction of the four low-lying isomers computed at various DFT and CCSD(T) levels for the [Be,N,C,O] molecular system. The ground electronic states and Be-O-C angles ( $\theta$ , degree, in parentheses) are given for only BeOCN; other three isomers are linear with <sup>2</sup> $\Sigma$  ground electronic states.

**Table S6** Valent molecular orbitals (VMOs) and the number of occupied electron (in parentheses), the contribution ((Cont., %)) of an atomic orbital (AO) to a MO, total contribution (TC) and composition proportion (CP) of all AOs of one atom to a MO, and orbital delocalization indices (ODI) computed at the CCSD(T)/*aug-cc-pVQZ* level of theory for BeNCO.

**Table S7** Valent molecular orbitals (VMOs) and the number of occupied electron (in parentheses), the contribution ((Cont., %)) of an atomic orbital (AO) to a MO, total contribution (TC) and composition proportion (CP) of all AOs of one atom to a MO, and orbital delocalization indices (ODI) computed at the CCSD(T)/*aug-cc-pVQZ* level of theory for OBeNC.

**Table S8** Local topological properties (in a.u.) of the electronic charge density distribution at bond critical points (BCPs) and bond delocalization indices (BDI), computed at the CCSD(T)/*aug-cc-pVQZ* level of theory, of BeNCO and OBeNC.

**Table S9** CCSD/*aug-cc-pCVTZ*-computed vibrational spectra of BeNCO and OBeNC using <sup>13</sup>C, <sup>15</sup>N, and <sup>18</sup>O isotopes.

**Fig. S1** Schematic structures and relative electronic energies (REs) with ZPVE correction of the isomers optimized at the B2PLYPD3/6-311+G(2df) (REs in parentheses), B3LYP-D3BJ/6-311+G(2df) (REs in square brackets), and M06-2X-D3/*aug-cc-pVQZ* (REs in curly brackets) levels of theory for the [Be,N,C,O] isomers in electronic quartet.

**Fig. S2** Isomerization reaction potential energy profiles of the [Be,N,C,O] system constructed at the B3LYP-D3BJ/6-311+G(2df) (a) and M06-2X-D3/*aug-cc-pVQZ* (b) levels of theory.

**Fig. S3** Schematic structures of some model compounds. The bond lengths ( $\text{\AA}$ ) optimized at the B3LYP-D3BJ/6-311++G(2df,2p) and B3LYP-D3BJ/6-311++G(d,p) are shown in blue and magenta, respectively.

**Fig. S4** Valent molecular orbitals (isovalue = 0.06), computed at the CCSD(T)/*aug-cc-pVQZ* level of theory, of BeNCO.

**Fig. S5** Valent molecular orbitals (isovalue = 0.06), computed at the CCSD(T)/*aug-cc-pVQZ* level of theory, of OBeNC.

**Fig. S6** Electrostatic potential plots and Mulliken charges ( $|e|$ , in red), computed at the CCSD(T)/*cc-pVQZ* level of theory, of four model molecules. The bond distances in blue and wine were optimized at the CCSD(T)/*aug-cc-pVQZ* and B3LYP-D3BJ/6-311+G(2df) levels of theory, respectively.

**Fig. S7** Valent molecular orbitals (isovalue = 0.06), computed at the CCSD(T)/*cc-pVQZ* level of theory, of four model molecules.

**Table S1** Internal coordinates of the isomers and transition states, located at the B2PLYPD3/6-311+G(2df) level of theory, of the [Be,N,C,O] system.

|                                                                                                                                                                                                                                                      |                                                                                                                                                                                                                                                       |                                                                                                                                                                                                                                                        |                                                                                                                                                                                                                                                         |
|------------------------------------------------------------------------------------------------------------------------------------------------------------------------------------------------------------------------------------------------------|-------------------------------------------------------------------------------------------------------------------------------------------------------------------------------------------------------------------------------------------------------|--------------------------------------------------------------------------------------------------------------------------------------------------------------------------------------------------------------------------------------------------------|---------------------------------------------------------------------------------------------------------------------------------------------------------------------------------------------------------------------------------------------------------|
| <p><b>BeNCO (1)</b></p> <p>Be<br/>N,1,r1<br/>X,2,1.,1,90.<br/>C,2,r2,3,90.,1,180.,0<br/>X,4,1.,2,90.,3,180.,0<br/>O,4,r3,5,90.,2,180.,0<br/>Variables:<br/>r1=1.48851163<br/>r2=1.19862813<br/>r3=1.16655878</p>                                     | <p><b>OBeNC (2)</b></p> <p>O<br/>Be,1,r1<br/>X,2,1.,1,90.<br/>N,2,r2,3,90.,1,180.,0<br/>X,4,1.,2,90.,3,0.,0<br/>C,4,r3,5,90.,2,180.,0<br/>Variables:<br/>r1=1.46199517<br/>r2=1.52075882<br/>r3=1.17471673</p>                                        | <p><b>Be-cOCN (3)</b></p> <p>Be<br/>O,1,r1<br/>X,2,1.,1,90.<br/>C,2,r2,3,90.,1,a1,0<br/>X,4,1.,2,90.,3,180.,0<br/>N,4,r3,5,90.,2,a2,0<br/>Variables:<br/>r1=1.41608722<br/>r2=1.26544947<br/>r3=1.16246514<br/>a1=170.46427889<br/>a2=179.52399415</p> | <p><b>OBeCN (4)</b></p> <p>O<br/>Be,1,r1<br/>X,2,1.,1,90.<br/>C,2,r2,3,90.,1,180.,0<br/>X,4,1.,2,90.,3,0.,0<br/>N,4,r3,5,90.,2,180.,0<br/>Variables:<br/>r1=1.45659113<br/>r2=1.649667<br/>r3=1.15409231</p>                                            |
| <p><b>BeCNO (5)</b></p> <p>Be<br/>C,1,r1<br/>X,2,1.,1,90.<br/>N,2,r2,3,90.,1,180.,0<br/>X,4,1.,2,90.,3,180.,0<br/>O,4,r3,5,90.,2,180.,0<br/>Variables:<br/>r1=1.62538767<br/>r2=1.17156357<br/>r3=1.19339547</p>                                     | <p><b>Be-cCNO (6)</b></p> <p>Be<br/>C,1,r1<br/>X,2,1.,1,90.<br/>N,2,r2,3,90.,1,a1,0<br/>X,4,1.,2,90.,3,0.,0<br/>O,4,r3,5,90.,2,a2,0<br/>Variables:<br/>r1=3.61289024<br/>r2=1.16896816<br/>r3=1.30461788<br/>a1=14.98121091<br/>a2=183.96332942</p>   | <p><b>NBeCO (7)</b></p> <p>N<br/>Be,1,r1<br/>X,2,1.,1,90.<br/>C,2,r2,3,90.,1,180.,0<br/>X,4,1.,2,90.,3,180.,0<br/>O,4,r3,5,90.,2,180.,0<br/>Variables:<br/>r1=1.50737259<br/>r2=1.66575127<br/>r3=1.1403759</p>                                        | <p><b>N-cBeOC (8)</b></p> <p>N<br/>Be,1,r1<br/>X,2,1.,1,90.<br/>O,2,r2,3,90.,1,a1,0<br/>X,4,1.,2,90.,3,180.,0<br/>C,4,r3,5,90.,2,a2,0<br/>Variables:<br/>r1=1.54849323<br/>r2=1.60950949<br/>r3=1.21372512<br/>a1=155.31755879<br/>a2=78.35646227</p>   |
| <p><b>NBeOC (9)</b></p> <p>N<br/>Be,1,r1<br/>X,2,1.,1,90.<br/>O,2,r2,3,90.,1,180.,0<br/>X,4,1.,2,90.,3,180.,0<br/>C,4,r3,5,90.,2,180.,0<br/>Variables:<br/>r1=1.49626695<br/>r2=1.52981214<br/>r3=1.17498082</p>                                     | <p><b>Be-cNCO (10)</b></p> <p>Be<br/>N,1,r1<br/>X,2,1.,1,90.<br/>C,2,r2,3,90.,1,a1,0<br/>X,4,1.,2,90.,3,180.,0<br/>O,4,r3,5,90.,2,a2,0<br/>Variables:<br/>r1=1.51901126<br/>r2=1.33196084<br/>r3=1.3334134<br/>a1=184.30350373<br/>a2=71.97986724</p> | <p><b>BeC-cNO (11)</b></p> <p>Be<br/>C,1,r1<br/>X,2,1.,1,90.<br/>N,2,r2,3,90.,1,a1,0<br/>X,4,1.,2,90.,3,180.,0<br/>O,4,r3,5,90.,2,a2,0<br/>Variables:<br/>r1=1.71194687<br/>r2=1.24974194<br/>r3=1.68982623<br/>a1=143.53628643<br/>a2=52.43847674</p> | <p><b>BeNCO (1q)</b></p> <p>Be<br/>N,1,r1<br/>X,2,1.,1,90.<br/>C,2,r2,3,90.,1,a1,0<br/>X,4,1.,2,90.,3,180.,0<br/>O,4,r3,5,90.,2,a2,0<br/>Variables:<br/>r1=1.54672301<br/>r2=1.38353591<br/>r3=1.18943348<br/>a1=140.79191473<br/>a2=128.84097867</p>   |
| <p><b>BeOCN (2q)</b></p> <p>Be<br/>O,1,r1<br/>X,2,1.,1,90.<br/>C,2,r2,3,90.,1,a1,0<br/>X,4,1.,2,90.,3,180.,0<br/>N,4,r3,5,90.,2,a2,0<br/>Variables:<br/>r1=1.42814044<br/>r2=1.29615946<br/>r3=1.2876801<br/>a1=165.27848668<br/>a2=122.60345979</p> | <p><b>BeONC (3q)</b></p> <p>Be<br/>O,1,r1<br/>X,2,1.,1,90.<br/>N,2,r2,3,90.,1,a1,0<br/>X,4,1.,2,90.,3,180.,0<br/>C,4,r3,5,90.,2,a2,0<br/>Variables:<br/>r1=1.67570588<br/>r2=1.42616777<br/>r3=1.48487432<br/>a1=62.07872619<br/>a2=66.27207715</p>   | <p><b>BeCNO (4q)</b></p> <p>Be<br/>C,1,r1<br/>X,2,1.,1,90.<br/>N,2,r2,3,90.,1,a1,0<br/>X,4,1.,2,90.,3,180.,0<br/>O,4,r3,5,90.,2,a2,0<br/>Variables:<br/>r1=1.62875726<br/>r2=1.25164627<br/>r3=1.24873751<br/>a1=178.26119703<br/>a2=126.66987496</p>  | <p><b>Be-cNCO (5q)</b></p> <p>Be<br/>N,1,r1<br/>X,2,1.,1,90.<br/>C,2,r2,3,90.,1,a1,0<br/>X,4,1.,2,90.,3,180.,0<br/>O,4,r3,5,90.,2,a2,0<br/>Variables:<br/>r1=1.51621064<br/>r2=1.30746476<br/>r3=1.21400532<br/>a1=186.62147096<br/>a2=122.24204712</p> |

|                                                                                                                                                                                                                                        |                                                                                                                                                                                                                                       |                                                                                                                                                                                                                                       |                                                                                                                                                                                                                                        |
|----------------------------------------------------------------------------------------------------------------------------------------------------------------------------------------------------------------------------------------|---------------------------------------------------------------------------------------------------------------------------------------------------------------------------------------------------------------------------------------|---------------------------------------------------------------------------------------------------------------------------------------------------------------------------------------------------------------------------------------|----------------------------------------------------------------------------------------------------------------------------------------------------------------------------------------------------------------------------------------|
| <b>Be-cCNO (6q)</b><br>Be<br>C,1,r1<br>X,2,1.,1,90.<br>N,2,r2,3,90.,1,a1,0<br>X,4,1.,2,90.,3,180.,0<br>O,4,r3,5,90.,2,a2,0<br>Variables:<br>r1=1.64509219<br>r2=1.40959012<br>r3=1.41625329<br>a1=156.96099955<br>a2=57.9125082        | <b>OBeNC (7q)</b><br>O<br>Be,1,r1<br>X,2,1.,1,90.<br>N,2,r2,3,90.,1,180.,0<br>X,4,1.,2,90.,3,180.,0<br>C,4,r3,5,90.,2,180.,0<br>Variables:<br>r1=1.48541583<br>r2=1.49998799<br>r3=1.2174237                                          | <b>OBeCN (8q)</b><br>O<br>Be,1,r1<br>X,2,1.,1,90.<br>C,2,r2,3,90.,1,180.,0<br>X,4,1.,2,90.,3,180.,0<br>N,4,r3,5,90.,2,180.,0<br>Variables:<br>r1=1.47206153<br>r2=1.62443162<br>r3=1.2966569                                          | <b>N-cBeOC (9q)</b><br>N<br>Be,1,r1<br>X,2,1.,1,90.<br>O,2,r2,3,90.,1,a1,0<br>X,4,1.,2,90.,3,180.,0<br>C,4,r3,5,90.,2,a2,0<br>Variables:<br>r1=1.61490455<br>r2=1.61981219<br>r3=1.23786172<br>a1=145.7185159<br>a2=74.76943122        |
| <b>NBeOC (10q)</b><br>N<br>Be,1,r1<br>X,2,1.,1,90.<br>O,2,r2,3,90.,1,180.,0<br>X,4,1.,2,90.,3,180.,0<br>C,4,r3,5,90.,2,180.,0<br>Variables:<br>r1=1.60671952<br>r2=1.43519626<br>r3=1.26385521                                         | <b>NBeCO (11q)</b><br>N<br>Be,1,r1<br>X,2,1.,1,90.<br>C,2,r2,3,90.,1,180.,0<br>X,4,1.,2,90.,3,180.,0<br>O,4,r3,5,90.,2,180.,0<br>Variables:<br>r1=1.61608655<br>r2=1.63569823<br>r3=1.16995835                                        | <b>TS1</b><br>O<br>Be,1,r1<br>X,2,1.,1,90.<br>C,2,r2,3,90.,1,a1,0<br>X,4,1.,2,90.,3,180.,0<br>N,4,r3,5,90.,2,a2,0<br>Variables:<br>r1=1.39372836<br>r2=1.6537636<br>r3=1.18241369<br>a1=68.8266695<br>a2=179.58449138                 | <b>TS2</b><br>Be<br>N,1,r1<br>X,2,1.,1,90.<br>C,2,r2,3,90.,1,a1,0<br>X,4,1.,2,90.,3,0.,0<br>O,4,r3,5,90.,2,a2,0<br>Variables:<br>r1=1.78791721<br>r2=1.2058315<br>r3=1.24689023<br>a1=66.33686531<br>a2=145.99319027                   |
| <b>TS3</b><br>Be<br>C,1,r1<br>X,2,1.,1,90.<br>N,2,r2,3,90.,1,a1,0<br>X,4,1.,2,90.,3,d1,0<br>O,4,r3,5,90.,2,a2,0<br>Variables:<br>r1=1.63581592<br>r2=1.31062067<br>r3=1.7119902<br>a1=86.21034234<br>a2=49.30588318<br>d1=180.00481992 | <b>TS4</b><br>N<br>Be,1,r1<br>X,2,1.,1,90.<br>C,2,r2,3,90.,1,a1,0<br>X,4,1.,2,90.,3,180.,0<br>O,4,r3,5,90.,2,a2,0<br>Variables:<br>r1=1.45540639<br>r2=1.65356686<br>r3=1.13721538<br>a1=92.08884854<br>a2=188.33096452               | <b>TS5</b><br>Be<br>N,1,r1<br>X,2,1.,1,90.<br>C,2,r2,3,90.,1,a1,0<br>X,4,1.,2,90.,3,d1,0<br>O,4,r3,5,90.,2,a2,0<br>Variables:<br>r1=1.59544052<br>r2=1.376805<br>r3=1.29738687<br>a1=83.57644118<br>a2=73.66485188<br>d1=133.27483467 | <b>TS6</b><br>Be<br>N,1,r1<br>X,2,1.,1,90.<br>C,2,r2,3,90.,1,a1,0<br>X,4,1.,2,90.,3,0.,0<br>O,4,r3,5,90.,2,a2,0<br>Variables:<br>r1=1.46148729<br>r2=2.64916765<br>r3=1.15977604<br>a1=59.35275232<br>a2=82.73780742                   |
| <b>TS7</b><br>O<br>Be,1,r1<br>X,2,1.,1,90.<br>C,2,r2,3,90.,1,a1,0<br>X,4,1.,2,90.,3,180.,0<br>N,4,r3,5,90.,2,a2,0<br>Variables:<br>r1=1.46388007<br>r2=1.66837335<br>r3=1.17143297<br>a1=175.72042972<br>a2=89.83691677                | <b>TS8</b><br>Be<br>C,1,r1<br>X,2,1.,1,90.<br>N,2,r2,3,90.,1,a1,0<br>X,4,1.,2,90.,3,d1,0<br>O,4,r3,5,90.,2,a2,0<br>Variables:<br>r1=2.20294661<br>r2=1.19813955<br>r3=1.40705221<br>a1=56.3455755<br>a2=143.45389791<br>d1=0.00016794 | <b>TS9</b><br>Be<br>N,1,r1<br>X,2,1.,1,90.<br>C,2,r2,3,90.,1,a1,0<br>X,4,1.,2,90.,3,0.,0<br>O,4,r3,5,90.,2,a2,0<br>Variables:<br>r1=1.63217729<br>r2=1.20089508<br>r3=1.86144323<br>a1=75.69352856<br>a2=109.26974277                 | <b>TS10</b><br>Be<br>N,1,r1<br>X,2,1.,1,90.<br>C,2,r2,3,90.,1,a1,0<br>X,4,1.,2,90.,3,d1,0<br>O,4,r3,5,90.,2,a2,0<br>Variables:<br>r1=1.7094689<br>r2=1.2020547<br>r3=2.53847945<br>a1=189.88086903<br>a2=24.05659838<br>d1=-1.49522766 |

| TS11                                                                                                                                                                                                                                   | TS12                                                                                                                                                                                                                                 |  |  |
|----------------------------------------------------------------------------------------------------------------------------------------------------------------------------------------------------------------------------------------|--------------------------------------------------------------------------------------------------------------------------------------------------------------------------------------------------------------------------------------|--|--|
| <p>N<br/> Be,1,r1<br/> X,2,1.,1,90.<br/> C,2,r2,3,90.,1,a1,0<br/> X,4,1.,2,90.,3,180.,0<br/> O,4,r3,5,90.,2,a2,0<br/> Variables:<br/> r1=1.56812839<br/> r2=1.7698943<br/> r3=1.18628947<br/> a1=181.65893585<br/> a2=105.52999117</p> | <p>N<br/> Be,1,r1<br/> X,2,1.,1,90.<br/> O,2,r2,3,90.,1,a1,0<br/> X,4,1.,2,90.,3,180.,0<br/> C,4,r3,5,90.,2,a2,0<br/> Variables:<br/> r1=1.4908116<br/> r2=1.59295317<br/> r3=1.21391961<br/> a1=226.0873353<br/> a2=83.49349777</p> |  |  |

**Table S2** Internal coordinates of the isomers and transition states, located at the B3LYP-D3BJ/6-311+G(2df) level of theory, of the [Be,N,C,O] system.

|                                                                                                                                                                                                                                                      |                                                                                                                                                                                                                                                       |                                                                                                                                                                                                                                                        |                                                                                                                                                                                                                                                         |
|------------------------------------------------------------------------------------------------------------------------------------------------------------------------------------------------------------------------------------------------------|-------------------------------------------------------------------------------------------------------------------------------------------------------------------------------------------------------------------------------------------------------|--------------------------------------------------------------------------------------------------------------------------------------------------------------------------------------------------------------------------------------------------------|---------------------------------------------------------------------------------------------------------------------------------------------------------------------------------------------------------------------------------------------------------|
| <p><b>BeNCO (1)</b></p> <p>Be<br/>N,1,r1<br/>X,2,1.,1,90.<br/>C,2,r2,3,90.,1,180.,0<br/>X,4,1.,2,90.,3,180.,0<br/>O,4,r3,5,90.,2,180.,0<br/>Variables:<br/>r1=1.49281869<br/>r2=1.20175752<br/>r3=1.16795853</p>                                     | <p><b>OBeNC (2)</b></p> <p>O<br/>Be,1,r1<br/>X,2,1.,1,90.<br/>N,2,r2,3,90.,1,180.,0<br/>X,4,1.,2,90.,3,0.,0<br/>C,4,r3,5,90.,2,180.,0<br/>Variables:<br/>r1=1.46482349<br/>r2=1.52402716<br/>r3=1.17975959</p>                                        | <p><b>BeOCN (3)</b></p> <p>Be<br/>O,1,r1<br/>X,2,1.,1,90.<br/>C,2,r2,3,90.,1,180.,0<br/>X,4,1.,2,90.,3,180.,0<br/>N,4,r3,5,90.,2,180.,0<br/>Variables:<br/>r1=1.42164292<br/>r2=1.26502448<br/>r3=1.15864389</p>                                       | <p><b>OBeCN (4)</b></p> <p>O<br/>Be,1,r1<br/>X,2,1.,1,90.<br/>C,2,r2,3,90.,1,180.,0<br/>X,4,1.,2,90.,3,0.,0<br/>N,4,r3,5,90.,2,180.,0<br/>Variables:<br/>r1=1.46071921<br/>r2=1.65104772<br/>r3=1.15777275</p>                                          |
| <p><b>BeCNO (5)</b></p> <p>Be<br/>C,1,r1<br/>X,2,1.,1,90.<br/>N,2,r2,3,90.,1,180.,0<br/>X,4,1.,2,90.,3,180.,0<br/>O,4,r3,5,90.,2,180.,0<br/>Variables:<br/>r1=1.62924673<br/>r2=1.17529873<br/>r3=1.19565796</p>                                     | <p><b>Be-cCNO (6)</b></p> <p>Be<br/>C,1,r1<br/>X,2,1.,1,90.<br/>N,2,r2,3,90.,1,a1,0<br/>X,4,1.,2,90.,3,0.,0<br/>O,4,r3,5,90.,2,a2,0<br/>Variables:<br/>r1=3.65293007<br/>r2=1.17419664<br/>r3=1.30434411<br/>a1=13.85252139<br/>a2=184.56788465</p>   | <p><b>NBeCO (7)</b></p> <p>N<br/>Be,1,r1<br/>X,2,1.,1,90.<br/>C,2,r2,3,90.,1,180.,0<br/>X,4,1.,2,90.,3,180.,0<br/>O,4,r3,5,90.,2,180.,0<br/>Variables:<br/>r1=1.50817541<br/>r2=1.66646486<br/>r3=1.14263689</p>                                       | <p><b>N-cBeOC (8)</b></p> <p>N<br/>Be,1,r1<br/>X,2,1.,1,90.<br/>O,2,r2,3,90.,1,a1,0<br/>X,4,1.,2,90.,3,180.,0<br/>C,4,r3,5,90.,2,a2,0<br/>Variables:<br/>r1=1.5451696<br/>r2=1.62066576<br/>r3=1.21547178<br/>a1=157.8609506<br/>a2=78.15082603</p>     |
| <p><b>NBeOC (9)</b></p> <p>N<br/>Be,1,r1<br/>X,2,1.,1,90.<br/>O,2,r2,3,90.,1,180.,0<br/>X,4,1.,2,90.,3,180.,0<br/>C,4,r3,5,90.,2,180.,0<br/>Variables:<br/>r1=1.49627492<br/>r2=1.53968284<br/>r3=1.17920463</p>                                     | <p><b>Be-cNCO (10)</b></p> <p>Be<br/>N,1,r1<br/>X,2,1.,1,90.<br/>C,2,r2,3,90.,1,a1,0<br/>X,4,1.,2,90.,3,180.,0<br/>O,4,r3,5,90.,2,a2,0<br/>Variables:<br/>r1=1.52417851<br/>r2=1.3379852<br/>r3=1.33314178<br/>a1=185.57511488<br/>a2=72.20055945</p> | <p><b>BeC-cNO (11)</b></p> <p>Be<br/>C,1,r1<br/>X,2,1.,1,90.<br/>N,2,r2,3,90.,1,a1,0<br/>X,4,1.,2,90.,3,180.,0<br/>O,4,r3,5,90.,2,a2,0<br/>Variables:<br/>r1=1.71765006<br/>r2=1.25375085<br/>r3=1.69800889<br/>a1=143.57341785<br/>a2=52.20250136</p> | <p><b>BeNCO (1q)</b></p> <p>Be<br/>N,1,r1<br/>X,2,1.,1,90.<br/>C,2,r2,3,90.,1,a1,0<br/>X,4,1.,2,90.,3,180.,0<br/>O,4,r3,5,90.,2,a2,0<br/>Variables:<br/>r1=1.53469234<br/>r2=1.36016305<br/>r3=1.19833211<br/>a1=146.12051469<br/>a2=129.23473746</p>   |
| <p><b>BeOCN (2q)</b></p> <p>Be<br/>O,1,r1<br/>X,2,1.,1,90.<br/>C,2,r2,3,90.,1,a1,0<br/>X,4,1.,2,90.,3,180.,0<br/>N,4,r3,5,90.,2,a2,0<br/>Variables:<br/>r1=1.42350862<br/>r2=1.29658625<br/>r3=1.2846982<br/>a1=168.84691375<br/>a2=122.54896526</p> | <p><b>BeONC (3q)</b></p> <p>Be<br/>O,1,r1<br/>X,2,1.,1,90.<br/>N,2,r2,3,90.,1,a1,0<br/>X,4,1.,2,90.,3,180.,0<br/>C,4,r3,5,90.,2,a2,0<br/>Variables:<br/>r1=1.66334861<br/>r2=1.43214509<br/>r3=1.48264573<br/>a1=62.19742121<br/>a2=67.49607054</p>   | <p><b>BeCNO (4q)</b></p> <p>Be<br/>C,1,r1<br/>X,2,1.,1,90.<br/>N,2,r2,3,90.,1,a1,0<br/>X,4,1.,2,90.,3,180.,0<br/>O,4,r3,5,90.,2,a2,0<br/>Variables:<br/>r1=1.6222952<br/>r2=1.25621584<br/>r3=1.25224261<br/>a1=178.3845716<br/>a2=126.73393708</p>    | <p><b>Be-cNCO (5q)</b></p> <p>Be<br/>N,1,r1<br/>X,2,1.,1,90.<br/>C,2,r2,3,90.,1,a1,0<br/>X,4,1.,2,90.,3,180.,0<br/>O,4,r3,5,90.,2,a2,0<br/>Variables:<br/>r1=1.51049432<br/>r2=1.29742089<br/>r3=1.22188612<br/>a1=185.38787305<br/>a2=122.15041858</p> |

|                                                                                                                                                                                                                                         |                                                                                                                                                                                                                                         |                                                                                                                                                                                                                                       |                                                                                                                                                                                                                                         |
|-----------------------------------------------------------------------------------------------------------------------------------------------------------------------------------------------------------------------------------------|-----------------------------------------------------------------------------------------------------------------------------------------------------------------------------------------------------------------------------------------|---------------------------------------------------------------------------------------------------------------------------------------------------------------------------------------------------------------------------------------|-----------------------------------------------------------------------------------------------------------------------------------------------------------------------------------------------------------------------------------------|
| <b>Be-cCNO (6q)</b><br>Be<br>C,1,r1<br>X,2,1.,1,90.<br>N,2,r2,3,90.,1,a1,0<br>X,4,1.,2,90.,3,180.,0<br>O,4,r3,5,90.,2,a2,0<br>Variables:<br>r1=1.64111081<br>r2=1.41047196<br>r3=1.42105255<br>a1=156.86985551<br>a2=57.88081571        | <b>OBeNC (7q)</b><br>O<br>Be,1,r1<br>X,2,1.,1,90.<br>N,2,r2,3,90.,1,180.,0<br>X,4,1.,2,90.,3,180.,0<br>C,4,r3,5,90.,2,180.,0<br>Variables:<br>r1=1.4812914<br>r2=1.49665299<br>r3=1.22205395                                            | <b>OBeCN (8q)</b><br>O<br>Be,1,r1<br>X,2,1.,1,90.<br>C,2,r2,3,90.,1,180.,0<br>X,4,1.,2,90.,3,180.,0<br>N,4,r3,5,90.,2,180.,0<br>Variables:<br>r1=1.47206153<br>r2=1.62443162<br>r3=1.2966569                                          | <b>N-cBeOC (9q)</b><br>N<br>Be,1,r1<br>X,2,1.,1,90.<br>O,2,r2,3,90.,1,a1,0<br>X,4,1.,2,90.,3,180.,0<br>C,4,r3,5,90.,2,a2,0<br>Variables:<br>r1=1.60857784<br>r2=1.61581027<br>r3=1.23558145<br>a1=145.65883259<br>a2=74.75371702        |
| <b>NBeOC (10q)</b><br>N<br>Be,1,r1<br>X,2,1.,1,90.<br>O,2,r2,3,90.,1,180.,0<br>X,4,1.,2,90.,3,180.,0<br>C,4,r3,5,90.,2,180.,0<br>Variables:<br>r1=1.60211663<br>r2=1.43161125<br>r3=1.26202903                                          | <b>NBeCO (11q)</b><br>N<br>Be,1,r1<br>X,2,1.,1,90.<br>C,2,r2,3,90.,1,180.,0<br>X,4,1.,2,90.,3,180.,0<br>O,4,r3,5,90.,2,180.,0<br>Variables:<br>r1=1.61057553<br>r2=1.62943463<br>r3=1.16915273                                          | <b>TS1</b><br>O<br>Be,1,r1<br>X,2,1.,1,90.<br>C,2,r2,3,90.,1,a1,0<br>X,4,1.,2,90.,3,180.,0<br>N,4,r3,5,90.,2,a2,0<br>Variables:<br>r1=1.39165779<br>r2=1.65307789<br>r3=1.17965136<br>a1=70.39603441<br>a2=179.68394866               | <b>TS2</b><br>Be<br>N,1,r1<br>X,2,1.,1,90.<br>C,2,r2,3,90.,1,a1,0<br>X,4,1.,2,90.,3,0.,0<br>O,4,r3,5,90.,2,a2,0<br>Variables:<br>r1=1.80275493<br>r2=1.20729495<br>r3=1.24276537<br>a1=65.84696349<br>a2=147.929687                     |
| <b>TS3</b><br>Be<br>C,1,r1<br>X,2,1.,1,90.<br>N,2,r2,3,90.,1,a1,0<br>X,4,1.,2,90.,3,d1,0<br>O,4,r3,5,90.,2,a2,0<br>Variables:<br>r1=1.62827381<br>r2=1.30766156<br>r3=1.77047972<br>a1=88.85412272<br>a2=47.28843402<br>d1=180.00576406 | <b>TS4</b><br>N<br>Be,1,r1<br>X,2,1.,1,90.<br>C,2,r2,3,90.,1,a1,0<br>X,4,1.,2,90.,3,180.,0<br>O,4,r3,5,90.,2,a2,0<br>Variables:<br>r1=1.44459964<br>r2=1.69091737<br>r3=1.12829832<br>a1=107.58225608<br>a2=190.8456994                 | <b>TS5</b><br>Be<br>N,1,r1<br>X,2,1.,1,90.<br>C,2,r2,3,90.,1,a1,0<br>X,4,1.,2,90.,3,d1,0<br>O,4,r3,5,90.,2,a2,0<br>Variables:<br>r1=1.6017004<br>r2=1.37706889<br>r3=1.30502208<br>a1=83.7789527<br>a2=73.19804216<br>d1=132.81865185 | <b>TS6</b><br>Be<br>N,1,r1<br>X,2,1.,1,90.<br>C,2,r2,3,90.,1,a1,0<br>X,4,1.,2,90.,3,0.,0<br>O,4,r3,5,90.,2,a2,0<br>Variables:<br>r1=1.46286165<br>r2=2.58787846<br>r3=1.15970111<br>a1=61.00348308<br>a2=83.82231162                    |
| <b>TS7</b><br>O<br>Be,1,r1<br>X,2,1.,1,90.<br>C,2,r2,3,90.,1,a1,0<br>X,4,1.,2,90.,3,180.,0<br>N,4,r3,5,90.,2,a2,0<br>Variables:<br>r1=1.46132324<br>r2=1.66833844<br>r3=1.17487739<br>a1=176.2315139<br>a2=90.07522911                  | <b>TS8</b><br>Be<br>C,1,r1<br>X,2,1.,1,90.<br>N,2,r2,3,90.,1,a1,0<br>X,4,1.,2,90.,3,d1,0<br>O,4,r3,5,90.,2,a2,0<br>Variables:<br>r1=2.08483581<br>r2=1.20547926<br>r3=1.41073547<br>a1=58.79539349<br>a2=139.92312433<br>d1=-0.00000235 | <b>TS9</b><br>Be<br>N,1,r1<br>X,2,1.,1,90.<br>C,2,r2,3,90.,1,a1,0<br>X,4,1.,2,90.,3,0.,0<br>O,4,r3,5,90.,2,a2,0<br>Variables:<br>r1=1.6350046<br>r2=1.19888253<br>r3=1.9209165<br>a1=75.89992522<br>a2=108.09370052                   | <b>TS10</b><br>Be<br>N,1,r1<br>X,2,1.,1,90.<br>C,2,r2,3,90.,1,a1,0<br>X,4,1.,2,90.,3,d1,0<br>O,4,r3,5,90.,2,a2,0<br>Variables:<br>r1=1.68316239<br>r2=1.20177201<br>r3=2.55532712<br>a1=188.29327092<br>a2=24.97337627<br>d1=0.12188418 |



| TS11                                                                                                                                                                                                                                   | TS12                                                                                                                                                                                                                                 |  |  |
|----------------------------------------------------------------------------------------------------------------------------------------------------------------------------------------------------------------------------------------|--------------------------------------------------------------------------------------------------------------------------------------------------------------------------------------------------------------------------------------|--|--|
| <p>N<br/> Be,1,r1<br/> X,2,1.,1,90.<br/> C,2,r2,3,90.,1,a1,0<br/> X,4,1.,2,90.,3,180.,0<br/> O,4,r3,5,90.,2,a2,0<br/> Variables:<br/> r1=1.58628456<br/> r2=1.73682843<br/> r3=1.20343365<br/> a1=186.12461783<br/> a2=96.48954365</p> | <p>N<br/> Be,1,r1<br/> X,2,1.,1,90.<br/> O,2,r2,3,90.,1,a1,0<br/> X,4,1.,2,90.,3,180.,0<br/> C,4,r3,5,90.,2,a2,0<br/> Variables:<br/> r1=1.49737396<br/> r2=1.59571408<br/> r3=1.209235<br/> a1=220.68763724<br/> a2=83.70768127</p> |  |  |

**Table S3** Internal coordinates of the isomers and transition states, located at the M06-2X-D3/*aug-cc-pVQZ* level of theory, of the [Be,N,C,O] system.

|                                                                                                                                                                                                                                                       |                                                                                                                                                                                                                                                         |                                                                                                                                                                                                                                                        |                                                                                                                                                                                                                                                     |
|-------------------------------------------------------------------------------------------------------------------------------------------------------------------------------------------------------------------------------------------------------|---------------------------------------------------------------------------------------------------------------------------------------------------------------------------------------------------------------------------------------------------------|--------------------------------------------------------------------------------------------------------------------------------------------------------------------------------------------------------------------------------------------------------|-----------------------------------------------------------------------------------------------------------------------------------------------------------------------------------------------------------------------------------------------------|
| <p><b>BeNCO (1)</b></p> <p>Be<br/>N,1,r1<br/>X,2,1.,1,90.<br/>C,2,r2,3,90.,1,180.,0<br/>X,4,1.,2,90.,3,180.,0<br/>O,4,r3,5,90.,2,180.,0<br/>Variables:<br/>r1=1.48851163<br/>r2=1.19862813<br/>r3=1.16655878</p>                                      | <p><b>OBeNC (2)</b></p> <p>O<br/>Be,1,r1<br/>X,2,1.,1,90.<br/>N,2,r2,3,90.,1,180.,0<br/>X,4,1.,2,90.,3,0.,0<br/>C,4,r3,5,90.,2,180.,0<br/>Variables:<br/>r1=1.45969068<br/>r2=1.52364452<br/>r3=1.17191023</p>                                          | <p><b>BeOCN (3)</b></p> <p>Be<br/>O,1,r1<br/>X,2,1.,1,90.<br/>C,2,r2,3,90.,1,180.,0<br/>X,4,1.,2,90.,3,0.,0<br/>N,4,r3,5,90.,2,180.,0<br/>Variables:<br/>r1=1.41076711<br/>r2=1.26224901<br/>r3=1.1498688</p>                                          | <p><b>OBeCN (4)</b></p> <p>O<br/>Be,1,r1<br/>X,2,1.,1,90.<br/>C,2,r2,3,90.,1,180.,0<br/>X,4,1.,2,90.,3,0.,0<br/>N,4,r3,5,90.,2,180.,0<br/>Variables:<br/>r1=1.45442343<br/>r2=1.65648671<br/>r3=1.1497893</p>                                       |
| <p><b>Be-cCNO (6)</b></p> <p>Be<br/>C,1,r1<br/>X,2,1.,1,90.<br/>N,2,r2,3,90.,1,a1,0<br/>X,4,1.,2,90.,3,0.,0<br/>O,4,r3,5,90.,2,a2,0<br/>Variables:<br/>r1=3.62072445<br/>r2=1.16367597<br/>r3=1.29680248<br/>a1=14.79936943<br/>a2=183.12664288</p>   | <p><b>NBeCO (7)</b></p> <p>N<br/>Be,1,r1<br/>X,2,1.,1,90.<br/>C,2,r2,3,90.,1,180.,0<br/>X,4,1.,2,90.,3,180.,0<br/>O,4,r3,5,90.,2,180.,0<br/>Variables:<br/>r1=1.521159<br/>r2=1.66270268<br/>r3=1.13702189</p>                                          | <p><b>N-cBeOC (8)</b></p> <p>N<br/>Be,1,r1<br/>X,2,1.,1,90.<br/>O,2,r2,3,90.,1,a1,0<br/>X,4,1.,2,90.,3,180.,0<br/>C,4,r3,5,90.,2,a2,0<br/>Variables:<br/>r1=1.56568639<br/>r2=1.59404305<br/>r3=1.21530834<br/>a1=151.46823369<br/>a2=78.06611987</p>  | <p><b>NBeOC (9)</b></p> <p>N<br/>Be,1,r1<br/>X,2,1.,1,90.<br/>O,2,r2,3,90.,1,180.,0<br/>X,4,1.,2,90.,3,180.,0<br/>C,4,r3,5,90.,2,180.,0<br/>Variables:<br/>r1=1.46476117<br/>r2=1.58698443<br/>r3=1.14695195</p>                                    |
| <p><b>BeC-cNO (11)</b></p> <p>Be<br/>C,1,r1<br/>X,2,1.,1,90.<br/>N,2,r2,3,90.,1,a1,0<br/>X,4,1.,2,90.,3,180.,0<br/>O,4,r3,5,90.,2,a2,0<br/>Variables:<br/>r1=1.7136954<br/>r2=1.23774526<br/>r3=1.60074365<br/>a1=146.01811196<br/>a2=56.41945836</p> | <p><b>BeNCO (1q)</b></p> <p>Be<br/>N,1,r1<br/>X,2,1.,1,90.<br/>C,2,r2,3,90.,1,a1,0<br/>X,4,1.,2,90.,3,180.,0<br/>O,4,r3,5,90.,2,a2,0<br/>Variables:<br/>r1=1.5397481<br/>r2=1.36986943<br/>r3=1.18527854<br/>a1=142.17615301<br/>a2=128.5165608</p>     | <p><b>BeOCN (2q)</b></p> <p>Be<br/>O,1,r1<br/>X,2,1.,1,90.<br/>C,2,r2,3,90.,1,a1,0<br/>X,4,1.,2,90.,3,180.,0<br/>N,4,r3,5,90.,2,a2,0<br/>Variables:<br/>r1=1.42350862<br/>r2=1.29658625<br/>r3=1.2846982<br/>a1=168.84691375<br/>a2=122.54896526</p>   | <p><b>BeONC (3q)</b></p> <p>Be<br/>O,1,r1<br/>X,2,1.,1,90.<br/>N,2,r2,3,90.,1,a1,0<br/>X,4,1.,2,90.,3,180.,0<br/>C,4,r3,5,90.,2,a2,0<br/>Variables:<br/>r1=1.66334861<br/>r2=1.43214509<br/>r3=1.48264573<br/>a1=62.19742121<br/>a2=67.49607054</p> |
| <p><b>BeCNO (4q)</b></p> <p>Be<br/>C,1,r1<br/>X,2,1.,1,90.<br/>N,2,r2,3,90.,1,a1,0<br/>X,4,1.,2,90.,3,180.,0<br/>O,4,r3,5,90.,2,a2,0<br/>Variables:<br/>r1=1.62351086<br/>r2=1.24665095<br/>r3=1.24724529<br/>a1=178.4055917<br/>a2=125.88148308</p>  | <p><b>Be-cNCO (5q)</b></p> <p>Be<br/>N,1,r1<br/>X,2,1.,1,90.<br/>C,2,r2,3,90.,1,a1,0<br/>X,4,1.,2,90.,3,180.,0<br/>O,4,r3,5,90.,2,a2,0<br/>Variables:<br/>r1=1.51049432<br/>r2=1.29742089<br/>r3=1.22188612<br/>a1=185.38787305<br/>a2=122.15041858</p> | <p><b>Be-cCNO (6q)</b></p> <p>Be<br/>C,1,r1<br/>X,2,1.,1,90.<br/>N,2,r2,3,90.,1,a1,0<br/>X,4,1.,2,90.,3,180.,0<br/>O,4,r3,5,90.,2,a2,0<br/>Variables:<br/>r1=1.64111081<br/>r2=1.41047196<br/>r3=1.42105255<br/>a1=156.86985551<br/>a2=57.88081571</p> | <p><b>OBeNC (7q)</b></p> <p>O<br/>Be,1,r1<br/>X,2,1.,1,90.<br/>N,2,r2,3,90.,1,180.,0<br/>X,4,1.,2,90.,3,180.,0<br/>C,4,r3,5,90.,2,180.,0<br/>Variables:<br/>r1=1.48541583<br/>r2=1.49998799<br/>r3=1.2174237</p>                                    |

|                                                                                                                                                                                                                           |                                                                                                                                                                                                                                  |                                                                                                                                                                                                                                          |                                                                                                                                                                                                                                          |
|---------------------------------------------------------------------------------------------------------------------------------------------------------------------------------------------------------------------------|----------------------------------------------------------------------------------------------------------------------------------------------------------------------------------------------------------------------------------|------------------------------------------------------------------------------------------------------------------------------------------------------------------------------------------------------------------------------------------|------------------------------------------------------------------------------------------------------------------------------------------------------------------------------------------------------------------------------------------|
| <b>OBeCN (8q)</b><br>O<br>Be,1,r1<br>X,2,1.,1,90.<br>C,2,r2,3,90.,1,180.,0<br>X,4,1.,2,90.,3,180.,0<br>N,4,r3,5,90.,2,180.,0<br>Variables:<br>r1=1.47206153<br>r2=1.62443162<br>r3=1.2966569                              | <b>N-cBeOC (9q)</b><br>N<br>Be,1,r1<br>X,2,1.,1,90.<br>O,2,r2,3,90.,1,a1,0<br>X,4,1.,2,90.,3,180.,0<br>C,4,r3,5,90.,2,a2,0<br>Variables:<br>r1=1.60236365<br>r2=1.59314404<br>r3=1.22328505<br>a1=145.58840087<br>a2=76.44086804 | <b>NBeOC (10q)</b><br>N<br>Be,1,r1<br>X,2,1.,1,90.<br>O,2,r2,3,90.,1,180.,0<br>X,4,1.,2,90.,3,180.,0<br>C,4,r3,5,90.,2,180.,0<br>Variables:<br>r1=1.60211663<br>r2=1.43161125<br>r3=1.26202903                                           | <b>NBeCO (11q)</b><br>N<br>Be,1,r1<br>X,2,1.,1,90.<br>C,2,r2,3,90.,1,180.,0<br>X,4,1.,2,90.,3,180.,0<br>O,4,r3,5,90.,2,180.,0<br>Variables:<br>r1=1.61057553<br>r2=1.62943463<br>r3=1.16915273                                           |
| <b>TS1</b><br>O<br>Be,1,r1<br>X,2,1.,1,90.<br>C,2,r2,3,90.,1,a1,0<br>X,4,1.,2,90.,3,180.,0<br>N,4,r3,5,90.,2,a2,0<br>Variables:<br>r1=1.38878981<br>r2=1.64940083<br>r3=1.17822594<br>a1=69.47406891<br>a2=179.80403642   | <b>TS2</b><br>Be<br>N,1,r1<br>X,2,1.,1,90.<br>C,2,r2,3,90.,1,a1,0<br>X,4,1.,2,90.,3,0.,0<br>O,4,r3,5,90.,2,a2,0<br>Variables:<br>r1=1.75438739<br>r2=1.20478212<br>r3=1.23738728<br>a1=67.61513712<br>a2=146.77536673            | <b>TS3</b><br>Be<br>C,1,r1<br>X,2,1.,1,90.<br>N,2,r2,3,90.,1,a1,0<br>X,4,1.,2,90.,3,d1,0<br>O,4,r3,5,90.,2,a2,0<br>Variables:<br>r1=1.71979923<br>r2=1.27601815<br>r3=1.98065516<br>a1=121.81821632<br>a2=40.64197279<br>d1=180.25234766 | <b>TS4</b><br>N<br>Be,1,r1<br>X,2,1.,1,90.<br>C,2,r2,3,90.,1,a1,0<br>X,4,1.,2,90.,3,180.,0<br>O,4,r3,5,90.,2,a2,0<br>Variables:<br>r1=1.45438086<br>r2=1.65238384<br>r3=1.1338031<br>a1=94.2849313<br>a2=189.14270709                    |
| <b>TS6</b><br>Be<br>N,1,r1<br>X,2,1.,1,90.<br>C,2,r2,3,90.,1,a1,0<br>X,4,1.,2,90.,3,0.,0<br>O,4,r3,5,90.,2,a2,0<br>Variables:<br>r1=1.45163334<br>r2=2.7308922<br>r3=1.15640199<br>a1=55.94793437<br>a2=80.72865883       | <b>TS7</b><br>O<br>Be,1,r1<br>X,2,1.,1,90.<br>C,2,r2,3,90.,1,a1,0<br>X,4,1.,2,90.,3,180.,0<br>N,4,r3,5,90.,2,a2,0<br>Variables:<br>r1=1.4598733<br>r2=1.66609769<br>r3=1.1672892<br>a1=176.3990892<br>a2=90.92218249             | <b>TS9</b><br>Be<br>N,1,r1<br>X,2,1.,1,90.<br>C,2,r2,3,90.,1,a1,0<br>X,4,1.,2,90.,3,0.,0<br>O,4,r3,5,90.,2,a2,0<br>Variables:<br>r1=1.62910532<br>r2=1.19671208<br>r3=1.86625327<br>a1=75.76924733<br>a2=109.06165319                    | <b>TS10</b><br>Be<br>N,1,r1<br>X,2,1.,1,90.<br>C,2,r2,3,90.,1,a1,0<br>X,4,1.,2,90.,3,d1,0<br>O,4,r3,5,90.,2,a2,0<br>Variables:<br>r1=1.68929257<br>r2=1.19695646<br>r3=2.53324065<br>a1=189.67054803<br>a2=24.29240652<br>d1=-0.04185431 |
| <b>TS11</b><br>N<br>Be,1,r1<br>X,2,1.,1,90.<br>C,2,r2,3,90.,1,a1,0<br>X,4,1.,2,90.,3,180.,0<br>O,4,r3,5,90.,2,a2,0<br>Variables:<br>r1=1.56732595<br>r2=1.77104424<br>r3=1.18376997<br>a1=181.76235526<br>a2=105.75705932 | <b>TS12</b><br>N<br>Be,1,r1<br>X,2,1.,1,90.<br>O,2,r2,3,90.,1,a1,0<br>X,4,1.,2,90.,3,180.,0<br>C,4,r3,5,90.,2,a2,0<br>Variables:<br>r1=1.49210214<br>r2=1.58560214<br>r3=1.20999394<br>a1=222.77153182<br>a2=83.86406236         |                                                                                                                                                                                                                                          |                                                                                                                                                                                                                                          |

**Table S4** Relative electronic energies ( $\Delta E$ , in kcal mol<sup>-1</sup>) with ZPVE correction, relative enthalpies ( $\Delta H$ , in kcal mol<sup>-1</sup>), and relative Gibbs free energies ( $\Delta G$ , in kcal mol<sup>-1</sup>) of the isomers, transition states, and dissociation fragments of the [Be,N,C,O] molecular system computed at different levels and the HOMO-LUMO gaps (HLGs, in eV) computed at the B2PLYPD3/6-311+G(2df).

| Species                                   | B3LYP-D3BJ/<br>6-311+G(2df) |            |            | B2PLYPD3/<br>6-311+G(2df) |            |            |      | M06-2X-D3/<br><i>aug-cc-pVQZ</i> |            |            |
|-------------------------------------------|-----------------------------|------------|------------|---------------------------|------------|------------|------|----------------------------------|------------|------------|
|                                           | $\Delta E$                  | $\Delta H$ | $\Delta G$ | $\Delta E$                | $\Delta H$ | $\Delta G$ | HLGs | $\Delta E$                       | $\Delta H$ | $\Delta G$ |
| <b>1</b> ( $C_{\infty v}$ , $^2\Sigma$ )  | 0.00                        | 0.00       | 0.00       | 0.00                      | 0.00       | 0.00       | 5.99 | 0.00                             | 0.00       | 0.00       |
| <b>2</b> ( $C_{\infty v}$ , $^2\Pi$ )     | 19.56                       | 19.91      | 19.22      | 20.08                     | 20.41      | 19.79      | 7.62 | 17.23                            | 17.50      | 17.21      |
| <b>3a</b> ( $C_{\infty v}$ , $^2\Sigma$ ) | 23.41                       | 23.70      | 22.35      | /                         | /          | /          | --   | 20.08                            | 19.21      | 21.36      |
| <b>3b</b> ( $C_s$ , $^2A'$ )              | /                           | /          | /          | 22.27                     | 22.32      | 21.53      | 6.04 | /                                | /          | /          |
| <b>4</b> ( $C_{\infty v}$ , $^2\Pi$ )     | 23.39                       | 23.63      | 23.20      | 21.96                     | 22.17      | 21.85      | 7.84 | 22.72                            | 22.90      | 22.81      |
| <b>5</b> ( $C_{\infty v}$ , $^2\Sigma$ )  | 83.54                       | 83.52      | 83.71      | 82.31                     | 82.28      | 82.54      | 6.12 | /                                | /          | /          |
| <b>6</b> ( $C_s$ , $^2A'$ )               | 87.31                       | 87.48      | 86.19      | 87.81                     | 87.95      | 86.74      | 6.04 | 83.99                            | 84.06      | 83.15      |
| <b>7</b> ( $C_{\infty v}$ , $^2\Pi$ )     | 84.55                       | 84.85      | 84.17      | 90.65                     | 90.92      | 90.36      | 8.19 | 89.24                            | 89.51      | 89.10      |
| <b>8</b> ( $C_s$ , $^2A''$ )              | 101.99                      | 102.20     | 100.58     | 106.19                    | 106.33     | 104.91     | 9.01 | 101.40                           | 101.49     | 100.36     |
| <b>9</b> ( $C_{\infty v}$ , $^2\Pi$ )     | 105.24                      | 105.68     | 104.82     | 113.54                    | 114.08     | 112.85     | 5.71 | 109.53                           | 110.01     | 109.25     |
| <b>10</b> ( $C_s$ , $^2A'$ )              | 126.65                      | 126.87     | 125.18     | 126.48                    | 126.69     | 124.98     | 6.04 | /                                | /          | /          |
| <b>11</b> ( $C_s$ , $^2A'$ )              | 126.68                      | 126.71     | 125.52     | 125.40                    | 125.30     | 124.36     | 6.12 | 128.21                           | 128.16     | 127.37     |
| <b>1q</b> ( $C_s$ , $^4A''$ )             | 104.26                      | 104.31     | 102.90     | 108.52                    | 108.51     | 107.24     | 3.70 | 110.54                           | 110.39     | 109.55     |
| <b>2q</b> ( $C_s$ , $^4A'$ )              | 107.08                      | 107.38     | 104.95     | 110.62                    | 110.94     | 108.33     | 4.90 | 111.06                           | 111.27     | 109.34     |
| <b>3q</b> ( $C_s$ , $^4A'$ )              | 190.90                      | 191.14     | 189.31     | 192.40                    | 192.57     | 190.93     | 4.73 | 189.51                           | 189.53     | 188.40     |
| <b>4q</b> ( $C_s$ , $^4A'$ )              | 143.19                      | 143.30     | 141.60     | 148.61                    | 148.69     | 147.08     | 4.87 | 151.37                           | 151.39     | 150.09     |
| <b>5q</b> ( $C_s$ , $^4A'$ )              | 91.53                       | 91.71      | 89.70      | 95.76                     | 95.93      | 93.93      | 4.27 | 99.10                            | 99.23      | 97.51      |
| <b>6q</b> ( $C_s$ , $^4A'$ )              | 157.72                      | 157.64     | 156.29     | 160.10                    | 160.00     | 158.74     | 5.50 | 159.54                           | 159.36     | 158.47     |
| <b>7q</b> ( $C_{\infty v}$ , $^4\Pi$ )    | 137.76                      | 138.21     | 136.85     | 140.86                    | 141.25     | 140.08     | 1.71 | 155.88                           | 155.92     | 155.54     |
| <b>8q</b> ( $C_{\infty v}$ , $^4\Pi$ )    | 137.49                      | 137.97     | 136.29     | 142.26                    | 142.70     | 141.16     | 2.97 | 142.95                           | 143.45     | 141.00     |
| <b>9q</b> ( $C_s$ , $^4A''$ )             | 109.72                      | 109.86     | 108.00     | 111.45                    | 111.56     | 109.81     | 6.12 | 107.19                           | 107.24     | 105.80     |
| <b>10q</b> ( $C_{\infty v}$ , $^4\Pi$ )   | 119.65                      | 120.15     | 118.65     | 123.12                    | 123.61     | 122.14     | 4.25 | 119.49                           | 119.92     | 118.81     |
| <b>11q</b> ( $C_{\infty v}$ , $^4\Pi$ )   | 100.02                      | 100.49     | 98.83      | 102.11                    | 102.49     | 101.26     | 4.16 | 101.55                           | 101.96     | 100.64     |
| <b>TS1</b>                                | 65.25                       | 65.01      | 64.34      | 67.27                     | 67.02      | 66.41      | /    | 67.79                            | 67.50      | 67.17      |
| <b>TS2</b>                                | 43.24                       | 42.76      | 42.66      | 41.59                     | 41.10      | 41.06      | /    | 37.92                            | 37.31      | 37.68      |
| <b>TS3</b>                                | 131.51                      | 131.41     | 130.32     | 135.73                    | 135.23     | 135.09     | /    | 139.77                           | 139.63     | 138.85     |
| <b>TS4</b>                                | 92.39                       | 92.08      | 91.42      | 97.53                     | 97.24      | 96.59      | /    | 97.13                            | 96.73      | 96.49      |
| <b>TS5</b>                                | 138.34                      | 138.14     | 137.53     | 137.30                    | 137.02     | 136.61     | /    | /                                | /          | /          |
| <b>TS6</b>                                | 122.23                      | 122.25     | 120.91     | 122.83                    | 122.76     | 121.71     | /    | 120.49                           | 120.40     | 119.57     |
| <b>TS7</b>                                | 37.18                       | 37.08      | 36.00      | 36.05                     | 35.92      | 34.94      | /    | 33.60                            | 33.42      | 32.74      |
| <b>TS8</b>                                | 95.62                       | 95.34      | 94.89      | 96.30                     | 95.96      | 95.67      | /    | /                                | /          | /          |
| <b>TS9</b>                                | 57.07                       | 56.65      | 56.39      | 59.32                     | 58.90      | 58.68      | /    | 55.88                            | 55.39      | 55.50      |
| <b>TS10</b>                               | 96.31                       | 96.20      | 95.37      | 99.85                     | 99.74      | 98.96      | /    | 96.15                            | 95.97      | 95.52      |
| <b>TS11</b>                               | 110.76                      | 110.80     | 109.35     | 114.14                    | 114.11     | 112.81     | /    | 113.21                           | 113.15     | 112.11     |
| <b>TS12</b>                               | 106.84                      | 106.61     | 105.82     | 113.70                    | 113.47     | 112.72     | /    | 107.61                           | 107.32     | 106.89     |
| Be ( $^1S$ ) + NCO ( $^2\Pi$ )            | 103.04                      | 103.67     | 96.42      | 103.02                    | 103.63     | 96.47      | /    | 104.92                           | 105.47     | 98.63      |
| Be ( $^1S$ ) + CNO ( $^2\Pi$ )            | 164.99                      | 165.83     | 158.28     | 166.59                    | 167.38     | 159.96     | /    | 165.79                           | 166.51     | 159.44     |
| Be ( $^3P$ ) + NCO ( $^2\Pi$ )            | 159.64                      | 160.28     | 152.38     | 160.59                    | 161.20     | 153.40     | /    | 168.07                           | 168.63     | 161.14     |
| Be ( $^3P$ ) + CNO ( $^2\Pi$ )            | 221.60                      | 222.43     | 214.24     | 224.16                    | 224.96     | 216.89     | /    | 228.95                           | 229.66     | 221.95     |
| BeO ( $^1\Sigma$ ) + CN ( $^2\Sigma$ )    | 135.24                      | 136.23     | 126.32     | 129.91                    | 130.88     | 121.04     | /    | 137.06                           | 137.98     | 128.48     |
| BeO ( $^3\Pi$ ) + CN ( $^2\Sigma$ )       | 154.79                      | 155.79     | 145.10     | 153.35                    | 154.33     | 143.72     | /    | 155.79                           | 156.72     | 146.43     |
| BeN ( $^2\Pi$ ) + CO ( $^1\Sigma$ )       | 127.82                      | 128.82     | 118.80     | 128.70                    | 129.67     | 119.73     | /    | 127.65                           | 128.59     | 118.95     |
| BeN ( $^4\Sigma$ ) + CO ( $^1\Sigma$ )    | 120.99                      | 122.01     | 111.47     | 119.92                    | 120.91     | 110.47     | /    | 118.44                           | 119.38     | 109.24     |
| O ( $^3P$ ) + BeNC ( $^2\Sigma$ )         | 140.14                      | 141.29     | 132.07     | 139.67                    | 140.81     | 131.66     | /    | 139.06                           | 140.19     | 131.21     |
| O ( $^3P$ ) + BeCN ( $^2\Sigma$ )         | 146.85                      | 147.90     | 138.89     | 144.32                    | 145.34     | 136.43     | /    | 147.68                           | 148.68     | 139.99     |

**Table S5** Relative electronic energies (E, in kcal mol<sup>-1</sup>) with ZPVE correction of the four low-lying isomers computed at various DFT and CCSD(T) levels for the [Be,N,C,O] molecular system. The ground electronic states and Be-O-C angles ( $\theta$ , degree, in parentheses) are given for only BeOCN; other three isomers are linear with <sup>2</sup> $\Sigma$  ground electronic states.

|                                   | BeNCO<br>(1) | OBeNC<br>(2) | BeOCN<br>(3a or 3b)                    | OBeCN<br>(4) |
|-----------------------------------|--------------|--------------|----------------------------------------|--------------|
| B3LYP/6-311+G(d)                  | 0.00         | 18.72        | 23.94 ( <sup>2</sup> $\Sigma$ , 180.0) | 21.98        |
| B3LYP-D3(BJ)/6-311+G(d)           | 0.00         | 19.14        | 24.12 ( <sup>2</sup> $\Sigma$ , 180.0) | 22.59        |
| B3LYP-D3(BJ)/6-311+G(2df)         | 0.00         | 19.56        | 23.41 ( <sup>2</sup> $\Sigma$ , 180.0) | 23.39        |
| M06-2X/cc-pVTZ                    | 0.00         | 16.79        | 20.27 ( <sup>2</sup> $\Sigma$ , 180.0) | 22.15        |
| M06-2X/cc-pVQZ                    | 0.00         | 17.23        | 20.14 ( <sup>2</sup> $\Sigma$ , 180.0) | 22.69        |
| M06-2X/aug-cc-pVTZ                | 0.00         | 16.61        | 20.10 ( <sup>2</sup> $\Sigma$ , 180.0) | 22.04        |
| M06-2X-D3/aug-cc-pVQZ             | 0.00         | 17.23        | 20.08 ( <sup>2</sup> $\Sigma$ , 180.0) | 22.72        |
| M06-2X/aug-cc-pCVQZ               | 0.00         | 17.23        | 20.03 ( <sup>2</sup> $\Sigma$ , 180.0) | 22.77        |
| PBE0/6-311+G(d)                   | 0.00         | 26.07        | 25.58 ( <sup>2</sup> $\Sigma$ , 180.0) | 28.68        |
| PBE0/aug-cc-pVQZ                  | 0.00         | 26.08        | 24.37 ( <sup>2</sup> $\Sigma$ , 180.0) | 29.23        |
| PBE0/aug-cc-pCVQZ                 | 0.00         | 26.17        | 24.37 ( <sup>2</sup> $\Sigma$ , 180.0) | 29.31        |
| B2PLYPD3/6-311+G(2df)             | 0.00         | 20.08        | 22.27 ( <sup>2</sup> A', 170.5)        | 21.96        |
| DSD-PBEP86-D3(BJ)/6-311+G(d)      | 0.00         | 20.93        | 22.82 ( <sup>2</sup> A', 155.6)        | 21.84        |
| DSD-PBEP86-D3(BJ)/aug-cc-pVTZ     | 0.00         | 21.75        | 21.77 ( <sup>2</sup> A', 155.6)        | 23.21        |
| DSD-PBEP86-D3(BJ)/aug-cc-pVQZ     | 0.00         | 22.14        | 21.82 ( <sup>2</sup> A', 155.6)        | 23.71        |
| DSD-PBEP86-D3(BJ)/aug-cc-pCVQZ    | 0.00         | 22.15        | 21.82 ( <sup>2</sup> A', 157.0)        | 23.72        |
| revDSD-PBEP86-D3(BJ)/6-311+G(d)   | 0.00         | 19.55        | 22.43 ( <sup>2</sup> A', 149.0)        | 20.50        |
| revDSD-PBEP86-D3(BJ)/aug-cc-pVTZ  | 0.00         | 20.23        | 21.39 ( <sup>2</sup> A', 155.7)        | 21.71        |
| revDSD-PBEP86-D3(BJ)/aug-cc-pVQZ  | 0.00         | 20.43        | 21.45 ( <sup>2</sup> A', 156.1)        | 22.19        |
| revDSD-PBEP86-D3(BJ)/aug-cc-pCVQZ | 0.00         | 20.61        | 21.46 ( <sup>2</sup> A', 155.7)        | 22.20        |
| $\omega$ B97XD/6-311+G(d)         | 0.00         | 22.15        | 24.57 ( <sup>2</sup> A', 163.4)        | 25.24        |
| $\omega$ B97XD/aug-cc-pVQZ        | 0.00         | 22.41        | 23.70 ( <sup>2</sup> A', 158.1)        | 25.86        |
| $\omega$ B97XD/aug-cc-pCVQZ       | 0.00         | 22.52        | 23.68 ( <sup>2</sup> A', 158.1)        | 25.94        |
| CCSD(T)/cc-pVTZ                   | 0.00         | 15.68        | 19.75 ( <sup>2</sup> A', 148.3)        | 17.84        |
| CCSD(T)/cc-pVQZ                   | 0.00         | 16.70        | 19.80 ( <sup>2</sup> A', 153.0)        | 19.07        |
| CCSD(T)/aug-cc-pVTZ               | 0.00         | 15.95        | 19.63 ( <sup>2</sup> A', 150.6)        | 18.26        |
| CCSD(T)/aug-cc-pVQZ               | 0.00         | 16.81        | 19.80 ( <sup>2</sup> A', 153.0)        | 19.29        |

**Table S6** Valent molecular orbitals (VMOs) and the number of occupied electron (in parentheses), the contribution ((Cont., %)) of an atomic orbital (AO) to a MO, total contribution (TC) and composition proportion (CP) of all AOs of one atom to a MO, and orbital delocalization indices (ODI) computed at the CCSD(T)/*aug-cc-pVQZ* level of theory for BeNCO.

| VMOs            | Atom            | AOs             | Cont. | TC              | CP                  | ODI                | VMOs            | Atom               | AOs             | Cont.           | TC    | CP                  | ODI   |
|-----------------|-----------------|-----------------|-------|-----------------|---------------------|--------------------|-----------------|--------------------|-----------------|-----------------|-------|---------------------|-------|
| 5 $\alpha$ (1)  | C               | 2s              | 15.93 | 18.78           | sp <sup>0.18</sup>  | 68.25              | 5 $\beta$ (1)   | C                  | 2s              | 15.80           | 18.64 | sp <sup>0.18</sup>  | 68.45 |
|                 |                 | 2p <sub>z</sub> | 2.85  |                 |                     |                    |                 |                    | 2p <sub>z</sub> | 2.84            |       |                     |       |
|                 | O               | 2s              | 77.88 | 81.22           | sp <sup>0.04</sup>  |                    |                 | O                  | 2s              | 78.04           | 81.36 | sp <sup>0.04</sup>  |       |
|                 |                 | 2p <sub>z</sub> | 3.34  |                 |                     |                    |                 |                    | 2p <sub>z</sub> | 3.32            |       |                     |       |
| 6 $\alpha$ (1)  | N               | 2s              | 71.13 | 74.51           | sp <sup>0.05</sup>  | 58.93              | 6 $\beta$ (1)   | N                  | 2s              | 70.45           | 74.11 | sp <sup>0.05</sup>  | 58.53 |
|                 |                 | 2p <sub>z</sub> | 3.38  |                 |                     |                    |                 |                    | 2p <sub>z</sub> | 3.66            |       |                     |       |
|                 | C               | 2s              | 12.59 | 21.48           | sp <sup>0.71</sup>  |                    |                 | C                  | 2s              | 12.84           | 21.82 | sp <sup>0.70</sup>  |       |
|                 |                 | 2p <sub>z</sub> | 8.89  |                 |                     |                    |                 |                    | 2p <sub>z</sub> | 8.98            |       |                     |       |
|                 | O               | 2s              | 4.02  | 4.02            |                     |                    |                 | O                  | 2s              | 4.06            | 4.06  |                     |       |
|                 | 7 $\alpha$ (1)  | Be              | 2s    | 5.77            | 7.38                |                    |                 | sp <sup>0.28</sup> | 30.96           | 7 $\beta$ (1)   | Be    | 2s                  |       |
| 2p <sub>z</sub> |                 |                 | 1.61  | 2p <sub>z</sub> |                     | 1.59               |                 |                    |                 |                 |       |                     |       |
| N               |                 | 2s              | 22.58 | 43.09           | sp <sup>0.91</sup>  | N                  | 2s              | 21.16              |                 |                 | 38.11 | sp <sup>0.80</sup>  |       |
|                 |                 | 2p <sub>z</sub> | 20.51 |                 |                     |                    | 2p <sub>z</sub> | 16.95              |                 |                 |       |                     |       |
| C               |                 | 2s              | 24.03 | 24.03           |                     | C                  | 2s              | 24.44              |                 |                 | 24.44 |                     |       |
| O               |                 | 2s              | 13.40 | 25.51           | sp <sup>0.90</sup>  | O                  | 2s              | 15.84              |                 |                 | 31.21 | sp <sup>0.97</sup>  |       |
|                 |                 | 2p <sub>z</sub> | 12.11 |                 |                     |                    | 2p <sub>z</sub> | 15.37              |                 |                 |       |                     |       |
| 8 $\alpha$ (1)  |                 | Be              | 2s    | 2.47            | 3.61                | sp <sup>0.46</sup> | 43.60           | 8 $\beta$ (1)      |                 |                 | Be    | 2s                  | 2.93  |
|                 | 2p <sub>z</sub> |                 | 1.14  | 2p <sub>z</sub> |                     |                    |                 |                    | 1.67            |                 |       |                     |       |
|                 | N               | 2s              | 2.47  | 18.47           | sp <sup>6.48</sup>  | N                  |                 |                    | 2s              | 3.68            | 23.07 | sp <sup>5.27</sup>  |       |
|                 |                 | 2p <sub>z</sub> | 16.00 |                 |                     |                    |                 |                    | 2p <sub>z</sub> | 19.39           |       |                     |       |
|                 | C               | 2s              | 1.36  | 15.13           | sp <sup>10.14</sup> | C                  |                 |                    | 2s              | 0.68            | 15.14 | sp <sup>21.19</sup> |       |
|                 |                 | 2p <sub>z</sub> | 13.77 |                 |                     |                    |                 |                    | 2p <sub>z</sub> | 14.46           |       |                     |       |
|                 | O               | 2s              | 23.42 | 62.80           | sp <sup>1.68</sup>  | O                  |                 |                    | 2s              | 20.83           | 57.19 | sp <sup>1.75</sup>  |       |
|                 |                 | 2p <sub>z</sub> | 39.38 |                 |                     |                    |                 |                    | 2p <sub>z</sub> | 36.36           |       |                     |       |
| 9 $\alpha$ (1)  | N               | 2p <sub>y</sub> | 16.70 | 16.70           |                     | 41.81              | 9 $\beta$ (1)   | N                  | 2p <sub>y</sub> | 16.50           | 16.50 |                     | 42.14 |
|                 | C               | 2p <sub>y</sub> | 26.63 | 26.63           |                     |                    |                 | C                  | 2p <sub>y</sub> | 26.41           | 26.41 |                     |       |
|                 |                 | 2p <sub>y</sub> | 56.67 | 56.67           |                     |                    |                 |                    | 2p <sub>y</sub> | 57.09           | 57.09 |                     |       |
| 10 $\alpha$ (1) | N               | 2p <sub>x</sub> | 16.70 | 16.70           |                     | 41.81              | 10 $\beta$ (1)  | N                  | 2p <sub>x</sub> | 16.50           | 16.50 |                     | 42.14 |
|                 | C               | 2p <sub>x</sub> | 26.63 | 26.63           |                     |                    |                 | C                  | 2p <sub>x</sub> | 26.41           | 26.41 |                     |       |
|                 |                 | 2p <sub>x</sub> | 56.67 | 56.67           |                     |                    |                 |                    | 2p <sub>x</sub> | 57.09           | 57.09 |                     |       |
| 11 $\alpha$ (1) | Be              | 2p <sub>y</sub> | 1.02  | 1.02            |                     | 48.23              | 11 $\beta$ (1)  | Be                 | 2p <sub>y</sub> | 0.73            | 0.73  |                     | 48.47 |
|                 | N               | 2p <sub>y</sub> | 59.64 | 59.64           |                     |                    |                 | N                  | 2p <sub>y</sub> | 59.61           | 59.61 |                     |       |
|                 |                 | 2p <sub>y</sub> | 1.36  | 1.36            |                     |                    |                 |                    | C               | 2p <sub>y</sub> | 1.59  | 1.59                |       |
|                 | O               | 2p <sub>y</sub> | 37.98 | 37.98           |                     |                    |                 | O                  | 2p <sub>y</sub> | 38.07           | 38.07 |                     |       |
| 12 $\alpha$ (1) | Be              | 2p <sub>x</sub> | 1.02  | 1.02            |                     | 48.23              | 12 $\beta$ (1)  | Be                 | 2p <sub>x</sub> | 0.73            | 0.73  |                     | 48.47 |
|                 | N               | 2p <sub>x</sub> | 59.64 | 59.64           |                     |                    |                 | N                  | 2p <sub>x</sub> | 59.61           | 59.61 |                     |       |
|                 |                 | 2p <sub>x</sub> | 1.36  | 1.36            |                     |                    |                 |                    | C               | 2p <sub>x</sub> | 1.59  | 1.59                |       |
|                 | O               | 2p <sub>x</sub> | 37.98 | 37.98           |                     |                    |                 | O                  | 2p <sub>x</sub> | 38.07           | 38.07 |                     |       |
| 13 $\alpha$ (1) | Be              | 2s              | 67.18 | 97.20           | sp <sup>0.45</sup>  | 91.11              | 13 $\beta$ (0)  | Be                 | 2s              | 91.25           | 94.90 | sp <sup>0.04</sup>  | 87.20 |
|                 |                 | 2p <sub>z</sub> | 30.02 |                 |                     |                    |                 |                    | 2p <sub>z</sub> | 3.64            |       |                     |       |
|                 | N               | 2s              | 1.78  | 1.78            |                     |                    |                 | N                  | 2s              | 1.34            | 2.56  | sp <sup>0.90</sup>  |       |
|                 |                 | 2p <sub>z</sub> | 1.02  | 1.02            |                     |                    |                 |                    | 2p <sub>z</sub> | 1.21            |       |                     |       |
|                 | C               | 2s              | 1.02  | 1.02            |                     |                    |                 | C                  | 2s              | 1.61            | 2.55  | sp <sup>0.58</sup>  |       |
|                 |                 |                 |       |                 |                     |                    |                 |                    | 2p <sub>z</sub> | 0.93            |       |                     |       |
| 14 $\alpha$ (0) | Be              | 2p <sub>x</sub> | 90.51 | 90.51           |                     | 77.81              | 14 $\beta$ (0)  | Be                 | 2p <sub>x</sub> | 94.95           | 94.95 |                     | 86.12 |
|                 | N               | 2p <sub>x</sub> | 1.12  | 1.12            |                     |                    |                 | C                  | 2p <sub>x</sub> | 3.37            | 3.37  |                     |       |
|                 | C               | 2p <sub>x</sub> | 5.47  | 5.47            |                     |                    |                 |                    | O               | 2p <sub>x</sub> | 1.68  | 1.68                |       |
|                 | O               | 2p <sub>x</sub> | 2.90  | 2.90            |                     |                    |                 |                    |                 |                 |       |                     |       |

**Table S7** Valent molecular orbitals (VMOs) and the number of occupied electron (in parentheses), the contribution ((Cont., %)) of an atomic orbital (AO) to a MO, total contribution (TC) and composition proportion (CP) of all AOs of one atom to a MO, and orbital delocalization indices (ODI) computed at the CCSD(T)/*aug-cc-pVQZ* level of theory for OBeNC.

| VMOs            | Atom | AOs             | Cont. | TC    | CP                 | ODI   | VMOs            | Atom            | AOs             | Cont. | TC    | CP                 | ODI   |
|-----------------|------|-----------------|-------|-------|--------------------|-------|-----------------|-----------------|-----------------|-------|-------|--------------------|-------|
| 5 $\alpha$ (1)  | O    | 2s              | 99.40 | 99.40 |                    | 95.27 | 6 $\beta$ (1)   | O               | 2s              | 97.59 | 97.59 |                    | 92.38 |
|                 | Be   | 2s              | 0.60  | 0.60  |                    |       |                 | Be              | 2s              | 1.71  | 2.41  | sp <sup>0.41</sup> |       |
|                 |      |                 |       |       |                    |       |                 | 2p <sub>z</sub> | 0.70            |       |       |                    |       |
| 6 $\alpha$ (1)  | N    | 2s              | 72.85 | 76.17 | sp <sup>0.05</sup> | 62.76 | 5 $\beta$ (1)   | N               | 2s              | 72.92 | 76.12 | sp <sup>0.05</sup> | 62.78 |
|                 |      | 2p <sub>z</sub> | 3.32  |       |                    |       |                 |                 | 2p <sub>z</sub> | 3.30  |       |                    |       |
|                 | C    | 2s              | 18.83 | 23.83 | sp <sup>0.27</sup> |       |                 | C               | 2s              | 18.79 | 23.78 | sp <sup>0.27</sup> |       |
|                 |      | 2p <sub>z</sub> | 5.00  |       |                    |       |                 |                 | 2p <sub>z</sub> | 5.00  |       |                    |       |
| 7 $\alpha$ (1)  | Be   | 2s              | 8.42  | 12.22 | sp <sup>0.45</sup> | 47.51 | 7 $\beta$ (1)   | Be              | 2s              | 8.49  | 12.28 | sp <sup>0.45</sup> | 47.48 |
|                 |      | 2p <sub>z</sub> | 3.80  |       |                    |       |                 |                 | 2p <sub>z</sub> | 3.79  |       |                    |       |
|                 | N    | 2s              | 24.82 | 63.96 | sp <sup>1.58</sup> |       |                 | N               | 2s              | 24.76 | 63.93 | sp <sup>1.58</sup> |       |
|                 |      | 2p <sub>z</sub> | 39.14 |       |                    |       |                 |                 | 2p <sub>z</sub> | 39.17 |       |                    |       |
|                 | C    | 2s              | 23.12 | 23.82 | sp <sup>0.03</sup> |       |                 | C               | 2s              | 23.10 | 23.80 | sp <sup>0.03</sup> |       |
|                 |      | 2p <sub>z</sub> | 0.70  |       |                    |       |                 |                 | 2p <sub>z</sub> | 0.70  |       |                    |       |
| 8 $\alpha$ (1)  | O    | 2p <sub>y</sub> | 99.21 | 99.21 |                    | 96.79 | 10 $\alpha$ (1) | O               | 2p <sub>x</sub> | 95.91 | 95.91 |                    | 88.97 |
|                 | Be   | 2p <sub>y</sub> | 0.79  | 0.79  |                    |       |                 | Be              | 2p <sub>x</sub> | 2.04  | 2.04  |                    |       |
|                 |      |                 |       |       |                    |       |                 | N               | 2p <sub>x</sub> | 2.05  | 2.05  |                    |       |
| 9 $\alpha$ (1)  | O    | 2s              | 7.50  | 82.29 | sp <sup>9.98</sup> | 68.93 | 8 $\beta$ (1)   | O               | 2s              | 9.34  | 79.80 | sp <sup>7.54</sup> | 65.82 |
|                 |      | 2p <sub>z</sub> | 74.79 |       |                    |       |                 |                 | 2p <sub>z</sub> | 70.46 |       |                    |       |
|                 | Be   | 2s              | 12.71 | 15.95 | sp <sup>0.25</sup> |       |                 | Be              | 2s              | 14.31 | 17.45 | sp <sup>0.22</sup> |       |
|                 |      | 2p <sub>z</sub> | 3.24  |       |                    |       |                 |                 | 2p <sub>z</sub> | 3.14  |       |                    |       |
|                 | N    | 2s              | 1.04  | 1.77  | sp <sup>0.70</sup> |       |                 | N               | 2s              | 0.76  | 1.94  | sp <sup>1.56</sup> |       |
|                 |      | 2p <sub>z</sub> | 0.73  |       |                    |       |                 |                 | 2p <sub>z</sub> | 1.18  |       |                    |       |
|                 |      |                 |       |       |                    |       |                 | C               | 2s              | 0.82  | 0.82  |                    |       |
| 9 $\beta$ (1)   | O    | 2p <sub>x</sub> | 46.12 | 46.12 |                    | 38.04 | 11 $\beta$ (1)  | O               | 2p <sub>x</sub> | 61.36 | 61.36 |                    | 46.53 |
|                 | Be   | 2p <sub>x</sub> | 3.16  | 3.16  |                    |       |                 | N               | 2p <sub>x</sub> | 30.03 | 30.03 |                    |       |
|                 | N    | 2p <sub>x</sub> | 40.07 | 40.07 |                    |       |                 | C               | 2p <sub>x</sub> | 8.61  | 8.61  |                    |       |
|                 | C    | 2p <sub>x</sub> | 10.64 | 10.64 |                    |       |                 |                 |                 |       |       |                    |       |
| 11 $\alpha$ (1) | O    | 2p <sub>y</sub> | 0.51  | 0.51  |                    | 63.16 | 10 $\beta$ (1)  | Be              | 2p <sub>y</sub> | 0.80  | 0.80  |                    | 64.47 |
|                 | Be   | 2p <sub>y</sub> | 0.61  | 0.61  |                    |       |                 | N               | 2p <sub>y</sub> | 78.20 | 78.20 |                    |       |
|                 | N    | 2p <sub>y</sub> | 77.66 | 77.66 |                    |       |                 | C               | 2p <sub>y</sub> | 21.01 | 21.01 |                    |       |
|                 | C    | 2p <sub>y</sub> | 21.22 | 21.22 |                    |       |                 |                 |                 |       |       |                    |       |
| 12 $\alpha$ (1) | O    | 2p <sub>x</sub> | 7.54  | 7.54  |                    | 56.16 | 13 $\beta$ (0)  | O               | 2p <sub>y</sub> | 23.30 | 23.30 |                    | 51.45 |
|                 | N    | 2p <sub>x</sub> | 72.46 | 72.46 |                    |       |                 | Be              | 2p <sub>y</sub> | 67.90 | 67.90 |                    |       |
|                 | C    | 2p <sub>x</sub> | 20.01 | 20.01 |                    |       |                 | C               | 2p <sub>y</sub> | 8.81  | 8.81  |                    |       |
| 13 $\alpha$ (1) | N    | 2s              | 1.32  | 9.79  | sp <sup>6.44</sup> | 79.25 | 12 $\beta$ (1)  | N               | 2s              | 1.32  | 9.80  | sp <sup>6.44</sup> | 79.23 |
|                 |      | 2p <sub>z</sub> | 8.47  |       |                    |       |                 |                 | 2p <sub>z</sub> | 8.48  |       |                    |       |
|                 | C    | 2s              | 64.08 | 90.21 | sp <sup>0.41</sup> |       |                 | C               | 2s              | 64.11 | 90.20 | sp <sup>0.41</sup> |       |
|                 |      | 2p <sub>z</sub> | 26.13 |       |                    |       |                 |                 | 2p <sub>z</sub> | 26.09 |       |                    |       |
| 14 $\alpha$ (0) | O    | 2s              | 4.70  | 5.72  | sp <sup>0.22</sup> | 64.96 | 14 $\beta$ (0)  | O               | 2s              | 4.62  | 5.61  | sp <sup>0.21</sup> | 64.53 |
|                 |      | 2p <sub>z</sub> | 1.02  |       |                    |       |                 |                 | 2p <sub>z</sub> | 0.99  |       |                    |       |
|                 | Be   | 2s              | 79.12 | 79.12 |                    |       |                 | Be              | 2s              | 78.80 | 78.80 |                    |       |
|                 |      | 2p <sub>z</sub> | 2.05  |       |                    |       |                 |                 | 2p <sub>z</sub> | 2.06  |       |                    |       |
|                 | N    | 2s              | 11.99 | 14.04 | sp <sup>0.17</sup> |       |                 | N               | 2s              | 12.35 | 14.41 | sp <sup>0.17</sup> |       |
|                 |      | 2p <sub>z</sub> | 2.05  |       |                    |       |                 |                 | 2p <sub>z</sub> | 2.06  |       |                    |       |
| C               | 2s   | 1.12            | 1.12  |       | C                  | 2s    | 1.19            | 1.19            |                 |       |       |                    |       |

**Table S8** Local topological properties (in a.u.) of the electronic charge density distribution at bond critical points (BCPs) and bond delocalization indices (BDI), computed at the CCSD(T)/*aug-cc-pVQZ* level of theory, of BeNCO and OBeNC.

| Species | Bond | BDI   | $\rho(\mathbf{r}_c)$ | $\nabla^2\rho(\mathbf{r}_c)$ | $V(\mathbf{r}_c)$ | $G(\mathbf{r}_c)$ | $ V(\mathbf{r}_c) /G(\mathbf{r}_c)$ | $H(\mathbf{r}_c)$ |
|---------|------|-------|----------------------|------------------------------|-------------------|-------------------|-------------------------------------|-------------------|
| BeNCO   | Be-N | 0.412 | 0.121                | 0.792                        | -0.259            | 0.229             | 1.134                               | -0.031            |
|         | N-C  | 1.324 | 0.453                | -0.993                       | -1.557            | 0.654             | 2.379                               | -0.902            |
|         | C-O  | 1.091 | 0.475                | 0.140                        | -1.896            | 0.965             | 1.964                               | -0.930            |
| OBeNC   | O-Be | 0.242 | 0.134                | 0.942                        | -0.307            | 0.271             | 1.132                               | -0.036            |
|         | Be-N | 0.213 | 0.116                | 0.704                        | -0.237            | 0.206             | 1.147                               | -0.030            |
|         | N-C  | 1.722 | 0.475                | -0.553                       | -1.794            | 0.828             | 2.167                               | -0.966            |

$\rho(r)$ , electronic charge density;  $\nabla^2\rho(r)$ , Laplacian function of electronic density,  $|V(r)|/G(r)$ , relationship between the potential energy density  $V(r)$  and the Lagrangian form of kinetic energy density  $G(r)$ , define as energies density of the unit of electrons; and  $H(r)$ , total energy density, define as  $V(r) + G(r)$ .  $\mathbf{r}_c$  refers to the position at bond critical point.

**Table S9** CCSD/*aug-cc-pCVTZ*-computed vibrational spectra of BeNCO and OBeNC using  $^{13}\text{C}$ ,  $^{15}\text{N}$ , and  $^{18}\text{O}$  isotopes.

|       | $^{13}\text{C}$  |        | $^{15}\text{N}$  |        | $^{18}\text{O}$  |        | mode <sup>d</sup>      |
|-------|------------------|--------|------------------|--------|------------------|--------|------------------------|
|       | $\nu^a$ or $C^b$ | $I^c$  | $\nu^a$ or $C^b$ | $I^c$  | $\nu^a$ or $C^b$ | $I^c$  |                        |
| BeNCO | 104.0            | 0.6    | 102.2            | 0.6    | 103.4            | 0.6    | BeNC ( $\delta$ )      |
|       | 104.0            | 0.6    | 102.2            | 0.6    | 103.4            | 0.6    | BeNC ( $\delta$ )      |
|       | 636.8            | 22.4   | 652.5            | 23.3   | 650.0            | 23.0   | NCO ( $\delta$ )       |
|       | 636.8            | 22.4   | 652.5            | 23.3   | 650.0            | 23.0   | NCO ( $\delta$ )       |
|       | 889.4            | 149.7  | 890.2            | 152.2  | 878.9            | 147.8  | Be-N-(CO) symm stretch |
|       | 1540.6           | 88.6   | 1516.0           | 106.2  | 1514.7           | 90.1   | NCO sym stretch        |
|       | 2260.4           | 1748.9 | 2309.5           | 1765.0 | 2307.2           | 1800.8 | NCO asym stretch       |
|       | 2419.8           | 17.3   | 2397.0           | 41.9   | 2384.2           | 50.6   | $\nu_5 + \nu_6$        |
|       | 3145.3           | 14.5   | 3194.7           | 14.9   | 3180.8           | 17.0   | $\nu_5 + \nu_7$        |
|       | 3785.5           | 16.9   | 3809.8           | 19.0   | 3806.4           | 17.4   | $\nu_6 + \nu_7$        |
| OBeNC | 156.4            | 2.7    | 154.3            | 2.8    | 155.8            | 3.3    | BeNC ( $\delta$ )      |
|       | 156.4            | 2.7    | 154.3            | 2.8    | 155.8            | 3.3    | BeNC ( $\delta$ )      |
|       | 391.2            | 106.4  | 389.4            | 106.0  | 387.7            | 104.8  | OBeN ( $\delta$ )      |
|       | 391.2            | 106.3  | 389.4            | 106.0  | 387.7            | 104.8  | OBeN ( $\delta$ )      |
|       | 565.2            | 2.3    | 565.0            | 1.9    | 552.7            | 3.1    | OBeN sym stretch       |
|       | 1255.3           | 535.7  | 1257.9           | 547.2  | 1251.1           | 535.8  | O-Be-NC asym stretch   |
|       | 2117.4           | 392.9  | 2119.6           | 368.4  | 2156.0           | 386.3  | OBe-N-C asym stretch   |

<sup>a</sup> anharmonic frequencies of fundamental modes ( $\text{cm}^{-1}$ ); <sup>b</sup> combination bands of fundamental modes ( $\text{cm}^{-1}$ ); <sup>c</sup> anharmonic vibrational intensities ( $\text{km mol}^{-1}$ ); <sup>d</sup> assignment of vibrational modes,  $\delta$ : scissoring vibration.



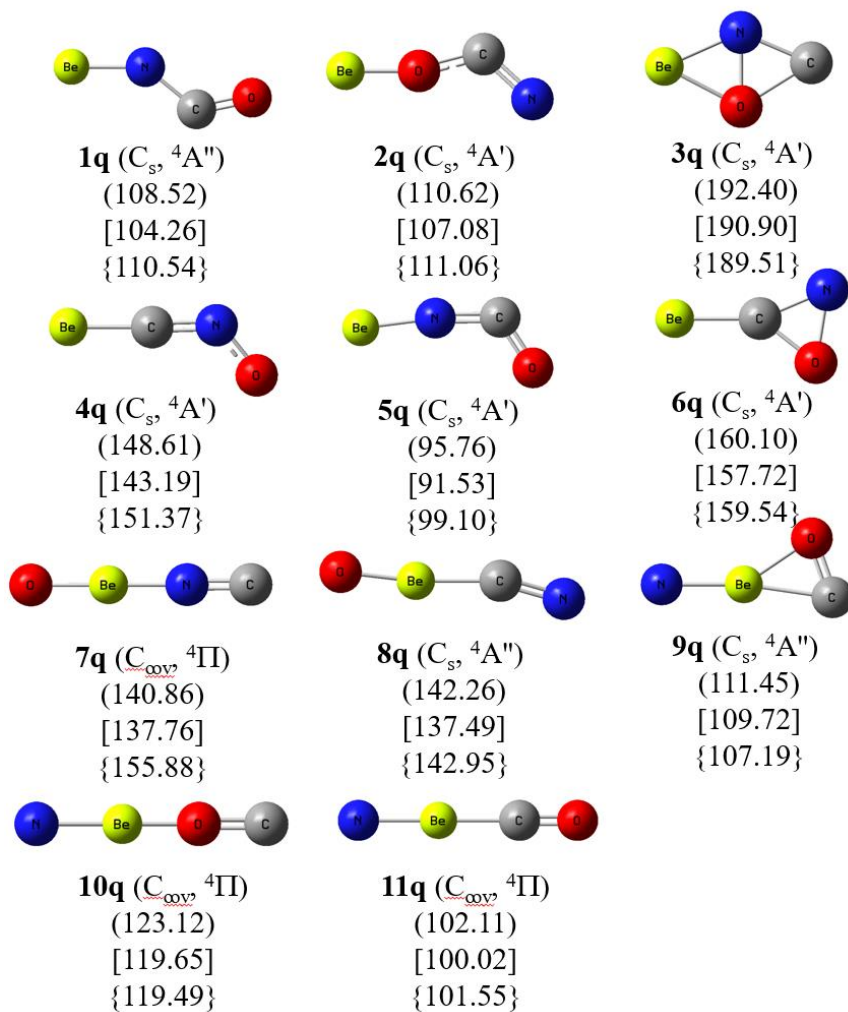

**Fig. S1** Schematic structures and relative electronic energies (REs) with ZPVE correction of the isomers optimized at the B2PLYPD3/6-311+G(2df) (REs in parentheses), B3LYP-D3BJ/6-311+G(2df) (REs in square brackets), and M06-2X-D3/*aug-cc-pVQZ* (REs in curly brackets) levels of theory for the [Be,N,C,O] isomers in electronic quartet.

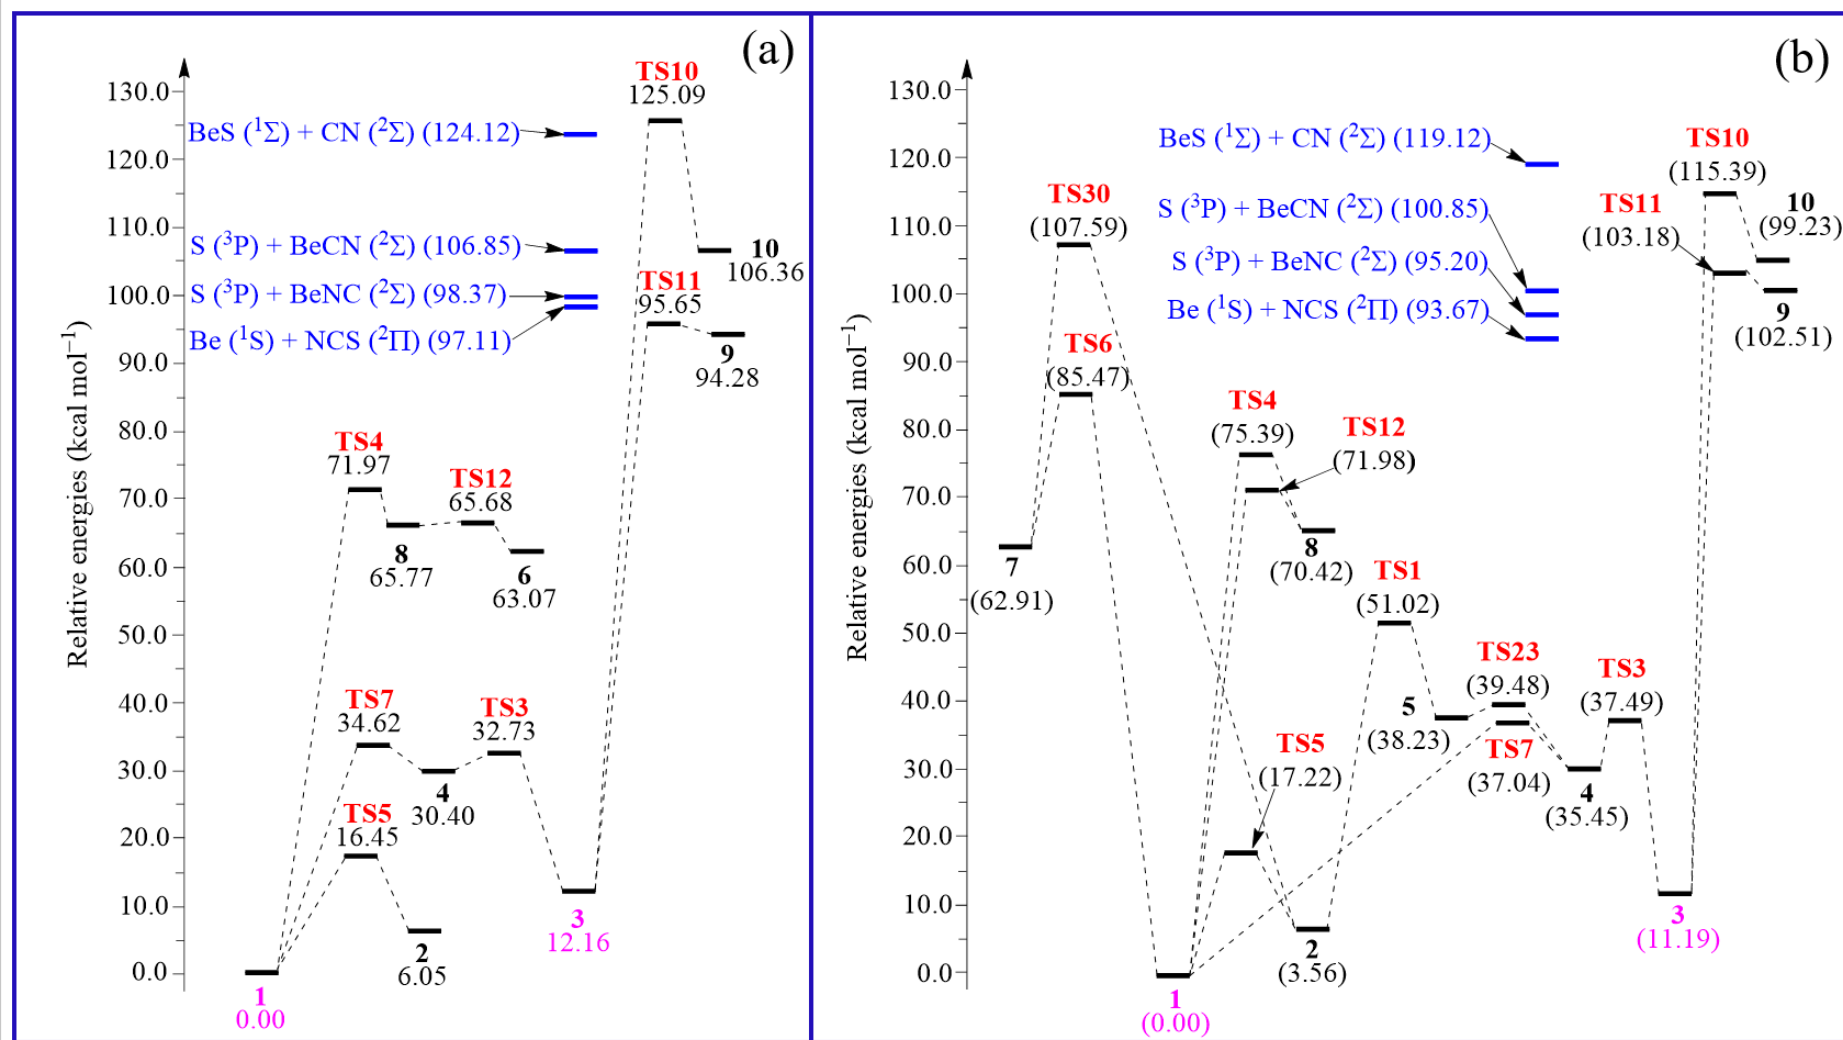

**Fig. S2** Isomerization reaction potential energy profiles of the [Be,N,C,O] system constructed at the B3LYP-D3BJ/6-311+G(2df) (a) and M06-2X-D3/aug-cc-pVQZ (b) levels of theory.

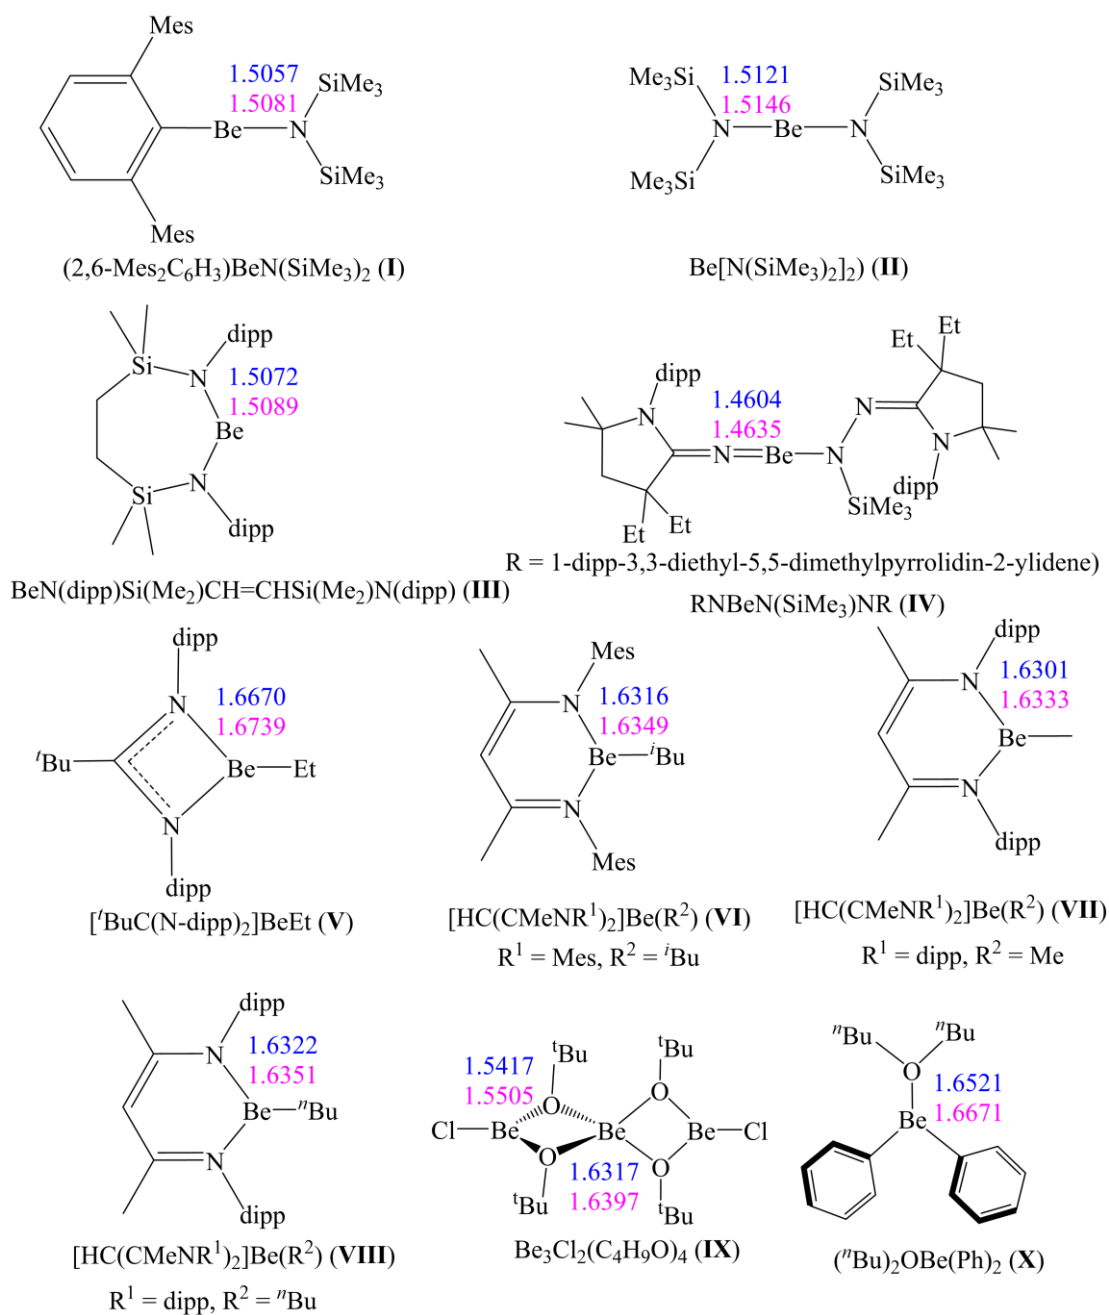

**Fig. S3** Schematic structures of some model compounds. The bond lengths (Å) optimized at the B3LYP-D3BJ/6-311++G(2df,2p) and B3LYP-D3BJ/6-311++G(d,p) are shown in blue and magenta, respectively.

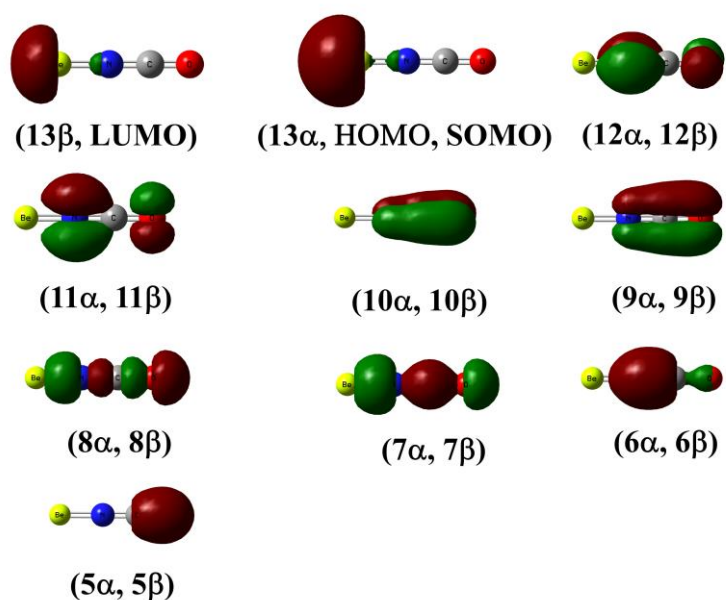

**Fig. S4** Valent molecular orbitals (isovalue = 0.06), computed at the CCSD(T)/aug-cc-pVQZ level of theory, of BeNCO.

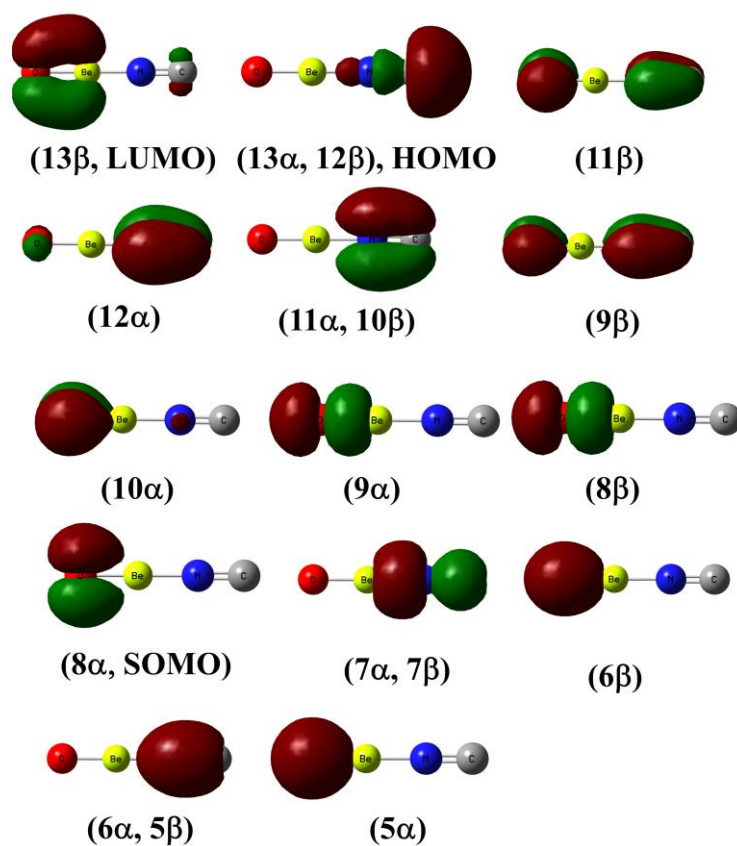

**Fig. S5** Valent molecular orbitals (isovalue = 0.06), computed at the CCSD(T)/aug-cc-pVQZ level of theory, of OBeNC.

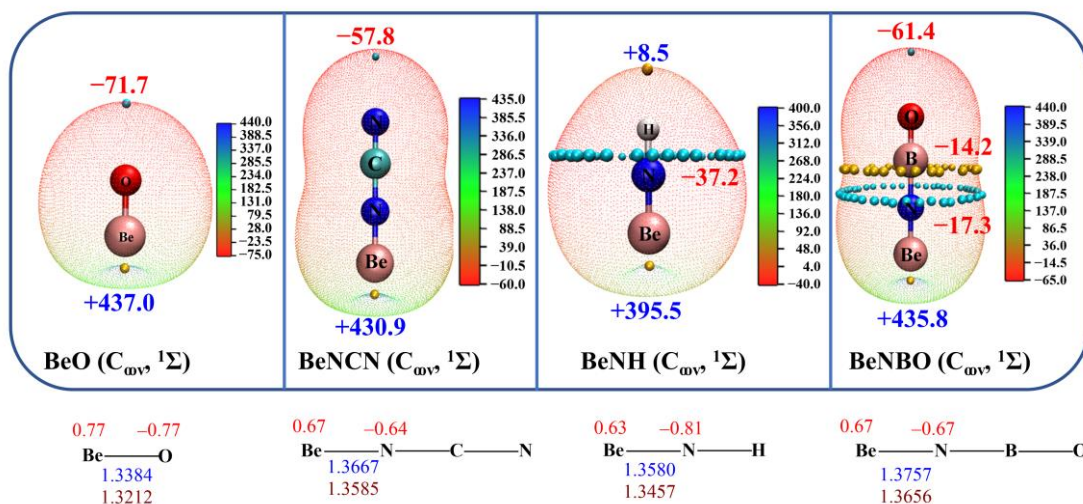

**Fig. S6** Electrostatic potential plots and Mulliken charges ( $|e|$ , in red), computed at the CCSD(T)/*cc-pVQZ* level of theory, of four model molecules. The bond distances in blue and wine were optimized at the CCSD(T)/*aug-cc-pVQZ* and B3LYP-D3BJ/6-311+G(2df) levels of theory, respectively.

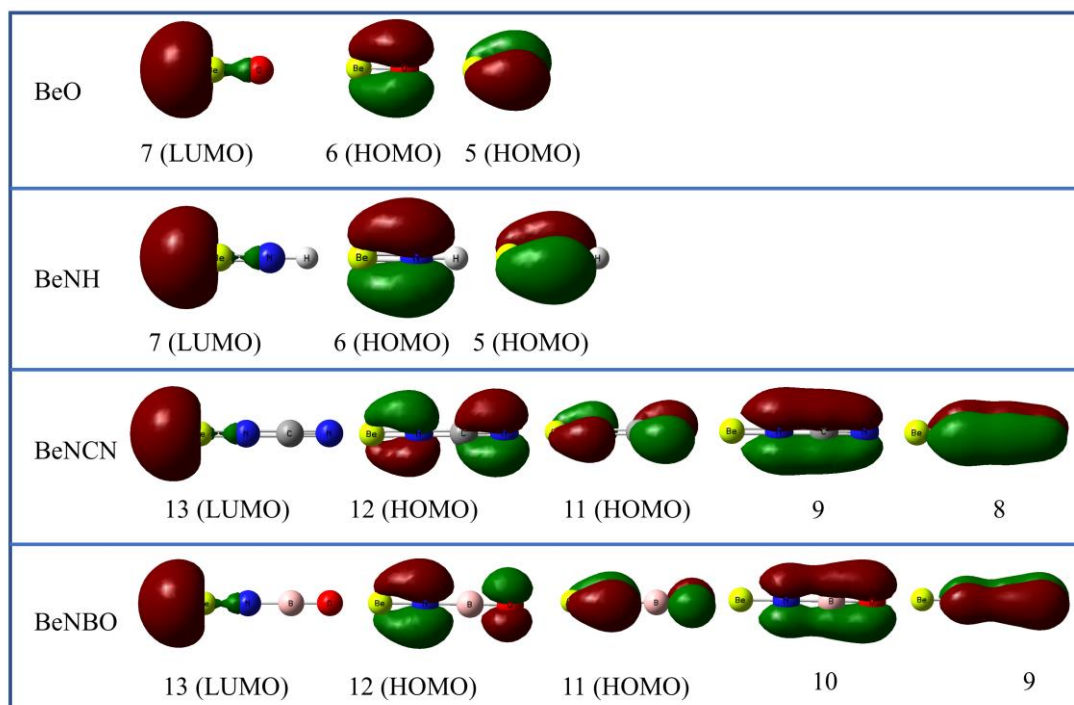

**Fig. S7** Valent molecular orbitals (isovalue = 0.06), computed at the CCSD(T)/*cc-pVQZ* level of theory, of four model molecules.
